# Supplementary material for: Durability of protection and immunogenicity of AZD1222 (ChAdOx1 nCoV-19) COVID-19 vaccine over 6 months
Source: PubMed Central journal article supplement (PMC9479753; doi:10.1172/jci160565), 2022-09-15
Supplement: jci-132-160565-s148.pdf [file jci-132-160565-s148.pdf]

## ICMJE DISCLOSURE FORM

Date: March 9, 2022

Your Name: Magdalena E Sobieszczyk

Manuscript Title: Durability of protection and immunogenicity of AZD1222 (ChAdOx1 nCoV-19) COVID-19 vaccine: updated results from a randomised, double-blind, placebo-controlled Phase 3 trial

Manuscript number (if known): \_\_\_\_\_

In the interest of transparency, we ask you to disclose all relationships/activities/interests listed below that are related to the content of your manuscript. "Related" means any relation with for-profit or not-for-profit third parties whose interests may be affected by the content of the manuscript. Disclosure represents a commitment to transparency and does not necessarily indicate a bias. If you are in doubt about whether to list a relationship/activity/interest, it is preferable that you do so.

The following questions apply to the author's relationships/activities/interests as they relate to the **current manuscript only**.

The author's relationships/activities/interests should be **defined broadly**. For example, if your manuscript pertains to the epidemiology of hypertension, you should declare all relationships with manufacturers of antihypertensive medication, even if that medication is not mentioned in the manuscript.

In item #1 below, report all support for the work reported in this manuscript without time limit. For all other items, the time frame for disclosure is the past 36 months.

|                                                           |                                                                                                                                                                                | Name all entities with whom you have this relationship or indicate none (add rows as needed)          | Specifications/Comments (e.g., if payments were made to you or to your institution) |
|-----------------------------------------------------------|--------------------------------------------------------------------------------------------------------------------------------------------------------------------------------|-------------------------------------------------------------------------------------------------------|-------------------------------------------------------------------------------------|
| <b>Time frame: Since the initial planning of the work</b> |                                                                                                                                                                                |                                                                                                       |                                                                                     |
| 1                                                         | All support for the present manuscript (e.g., funding, provision of study materials, medical writing, article processing charges, etc.)<br><b>No time limit for this item.</b> | ___ None                                                                                              |                                                                                     |
|                                                           |                                                                                                                                                                                | National Institutes of Health (NIH) and National Institute of Allergy and Infectious Diseases (NIAID) | Grants for study                                                                    |
|                                                           |                                                                                                                                                                                |                                                                                                       |                                                                                     |
|                                                           |                                                                                                                                                                                |                                                                                                       |                                                                                     |
|                                                           |                                                                                                                                                                                |                                                                                                       |                                                                                     |
|                                                           |                                                                                                                                                                                |                                                                                                       |                                                                                     |
|                                                           |                                                                                                                                                                                | AstraZeneca                                                                                           | Medical writing support                                                             |
| <b>Time frame: past 36 months</b>                         |                                                                                                                                                                                |                                                                                                       |                                                                                     |
| 2                                                         | Grants or contracts from any entity (if not indicated in item #1 above).                                                                                                       | ___ None                                                                                              |                                                                                     |
|                                                           |                                                                                                                                                                                | NIH/NIAID and Gates Foundation                                                                        | Grants, outside of submitted work                                                   |
|                                                           |                                                                                                                                                                                | Merck Sharpe and Dohme, Sanofi, and Gilead                                                            | Grants to institution, outside of submitted work                                    |
| 3                                                         | Royalties or licenses                                                                                                                                                          | __x__ None                                                                                            |                                                                                     |

|    |                                                                                                              |                                              |                                           |
|----|--------------------------------------------------------------------------------------------------------------|----------------------------------------------|-------------------------------------------|
|    |                                                                                                              |                                              |                                           |
| 4  | Consulting fees                                                                                              | <input checked="" type="checkbox"/> None     |                                           |
| 5  | Payment or honoraria for lectures, presentations, speakers bureaus, manuscript writing or educational events | <input checked="" type="checkbox"/> None     |                                           |
| 6  | Payment for expert testimony                                                                                 | <input checked="" type="checkbox"/> None     |                                           |
| 7  | Support for attending meetings and/or travel                                                                 | <input checked="" type="checkbox"/> None     |                                           |
| 8  | Patents planned, issued or pending                                                                           | <input checked="" type="checkbox"/> None     |                                           |
| 9  | Participation on a Data Safety Monitoring Board or Advisory Board                                            | <input checked="" type="checkbox"/> None     |                                           |
| 10 | Leadership or fiduciary role in other board, society, committee or advocacy group, paid or unpaid            | <input checked="" type="checkbox"/> None     |                                           |
| 11 | Stock or stock options                                                                                       | <input checked="" type="checkbox"/> None     |                                           |
| 12 | Receipt of equipment, materials, drugs, medical writing, gifts or other services                             | <input type="checkbox"/> None<br>AstraZeneca | Medical writing support – this manuscript |
| 13 | Other financial or non-financial interests                                                                   | <input checked="" type="checkbox"/> None     |                                           |

Please place an "X" next to the following statement to indicate your agreement:

I certify that I have answered every question and have not altered the wording of any of the questions on this form.

## ICMJE DISCLOSURE FORM

Date: 31 January 2022

Your Name: Jill Maaske

Manuscript Title: Durability of protection and immunogenicity of AZD1222 (ChAdOx1 nCoV-19) COVID-19 vaccine: updated results from a randomised, double-blind, placebo-controlled Phase 3 trial

Manuscript number (if known): \_\_\_\_\_

In the interest of transparency, we ask you to disclose all relationships/activities/interests listed below that are related to the content of your manuscript. "Related" means any relation with for-profit or not-for-profit third parties whose interests may be affected by the content of the manuscript. Disclosure represents a commitment to transparency and does not necessarily indicate a bias. If you are in doubt about whether to list a relationship/activity/interest, it is preferable that you do so.

The following questions apply to the author's relationships/activities/interests as they relate to the current manuscript only.

The author's relationships/activities/interests should be defined broadly. For example, if your manuscript pertains to the epidemiology of hypertension, you should declare all relationships with manufacturers of antihypertensive medication, even if that medication is not mentioned in the manuscript.

In item #1 below, report all support for the work reported in this manuscript without time limit. For all other items, the time frame for disclosure is the past 36 months.

|                                                           |                                                                                                                                                                                | Name all entities with whom you have this relationship or indicate none (add rows as needed) | Specifications/Comments (e.g., if payments were made to you or to your institution) |
|-----------------------------------------------------------|--------------------------------------------------------------------------------------------------------------------------------------------------------------------------------|----------------------------------------------------------------------------------------------|-------------------------------------------------------------------------------------|
| <b>Time frame: Since the initial planning of the work</b> |                                                                                                                                                                                |                                                                                              |                                                                                     |
| 1                                                         | All support for the present manuscript (e.g., funding, provision of study materials, medical writing, article processing charges, etc.)<br><b>No time limit for this item.</b> | ___ None                                                                                     |                                                                                     |
|                                                           |                                                                                                                                                                                |                                                                                              | Employee in AstraZeneca                                                             |
|                                                           |                                                                                                                                                                                |                                                                                              |                                                                                     |
|                                                           |                                                                                                                                                                                |                                                                                              |                                                                                     |
|                                                           |                                                                                                                                                                                |                                                                                              |                                                                                     |
|                                                           |                                                                                                                                                                                |                                                                                              |                                                                                     |
|                                                           |                                                                                                                                                                                |                                                                                              | AstraZeneca                                                                         |
| <b>Time frame: past 36 months</b>                         |                                                                                                                                                                                |                                                                                              |                                                                                     |
| 2                                                         | Grants or contracts from any entity (if not indicated in item #1 above).                                                                                                       | __X__ None                                                                                   |                                                                                     |
|                                                           |                                                                                                                                                                                |                                                                                              |                                                                                     |
| 3                                                         | Royalties or licenses                                                                                                                                                          | __X__ None                                                                                   |                                                                                     |
|                                                           |                                                                                                                                                                                |                                                                                              |                                                                                     |
| 4                                                         | Consulting fees                                                                                                                                                                | __X__ None                                                                                   |                                                                                     |
|                                                           |                                                                                                                                                                                |                                                                                              |                                                                                     |
|                                                           |                                                                                                                                                                                |                                                                                              |                                                                                     |

|    |                                                                                                              |                                                   |                                           |
|----|--------------------------------------------------------------------------------------------------------------|---------------------------------------------------|-------------------------------------------|
| 5  | Payment or honoraria for lectures, presentations, speakers bureaus, manuscript writing or educational events | <input checked="" type="checkbox"/> <u>X</u> None |                                           |
|    |                                                                                                              |                                                   |                                           |
|    |                                                                                                              |                                                   |                                           |
| 6  | Payment for expert testimony                                                                                 | <input checked="" type="checkbox"/> <u>X</u> None |                                           |
|    |                                                                                                              |                                                   |                                           |
|    |                                                                                                              |                                                   |                                           |
| 7  | Support for attending meetings and/or travel                                                                 | <input checked="" type="checkbox"/> <u>X</u> None |                                           |
|    |                                                                                                              |                                                   |                                           |
|    |                                                                                                              |                                                   |                                           |
| 8  | Patents planned, issued or pending                                                                           | <input checked="" type="checkbox"/> <u>X</u> None |                                           |
|    |                                                                                                              |                                                   |                                           |
|    |                                                                                                              |                                                   |                                           |
| 9  | Participation on a Data Safety Monitoring Board or Advisory Board                                            | <input checked="" type="checkbox"/> <u>X</u> None |                                           |
|    |                                                                                                              |                                                   |                                           |
|    |                                                                                                              |                                                   |                                           |
| 10 | Leadership or fiduciary role in other board, society, committee or advocacy group, paid or unpaid            | <input checked="" type="checkbox"/> <u>X</u> None |                                           |
|    |                                                                                                              |                                                   |                                           |
|    |                                                                                                              |                                                   |                                           |
| 11 | Stock or stock options                                                                                       | <input type="checkbox"/> <u>None</u>              |                                           |
|    |                                                                                                              |                                                   | Stockholder in AstraZeneca                |
|    |                                                                                                              |                                                   |                                           |
| 12 | Receipt of equipment, materials, drugs, medical writing, gifts or other services                             | <input checked="" type="checkbox"/> <u>X</u> None |                                           |
|    |                                                                                                              | AstraZeneca                                       | Medical writing support – this manuscript |
|    |                                                                                                              |                                                   |                                           |
| 13 | Other financial or non-financial interests                                                                   | <input checked="" type="checkbox"/> <u>X</u> None |                                           |
|    |                                                                                                              |                                                   |                                           |
|    |                                                                                                              |                                                   |                                           |

Please place an "X" next to the following statement to indicate your agreement:

X I certify that I have answered every question and have not altered the wording of any of the questions on this form.

## ICMJE DISCLOSURE FORM

Date: January 31, 2022 \_\_\_\_\_  
 Your Name: Ann R. Falsey \_\_\_\_\_  
 Manuscript Title: Durability of Protection and Immunogenicity of AZD1222 COVID vaccine: Updated results from a randomized , double blind, placebo controlled Phase 3 trial \_\_\_\_\_  
 Manuscript number (if known): \_\_\_\_\_

In the interest of transparency, we ask you to disclose all relationships/activities/interests listed below that are related to the content of your manuscript. “Related” means any relation with for-profit or not-for-profit third parties whose interests may be affected by the content of the manuscript. Disclosure represents a commitment to transparency and does not necessarily indicate a bias. If you are in doubt about whether to list a relationship/activity/interest, it is preferable that you do so.

The following questions apply to the author’s relationships/activities/interests as they relate to the current manuscript only.

The author’s relationships/activities/interests should be defined broadly. For example, if your manuscript pertains to the epidemiology of hypertension, you should declare all relationships with manufacturers of antihypertensive medication, even if that medication is not mentioned in the manuscript.

In item #1 below, report all support for the work reported in this manuscript without time limit. For all other items, the time frame for disclosure is the past 36 months.

|                                                           |                                                                                                                                                                                | Name all entities with whom you have this relationship or indicate none (add rows as needed) | Specifications/Comments (e.g., if payments were made to you or to your institution) |
|-----------------------------------------------------------|--------------------------------------------------------------------------------------------------------------------------------------------------------------------------------|----------------------------------------------------------------------------------------------|-------------------------------------------------------------------------------------|
| <b>Time frame: Since the initial planning of the work</b> |                                                                                                                                                                                |                                                                                              |                                                                                     |
| 1                                                         | All support for the present manuscript (e.g., funding, provision of study materials, medical writing, article processing charges, etc.)<br><b>No time limit for this item.</b> | <input checked="" type="checkbox"/> None                                                     | US government provided support for the study by grant from NIH                      |
|                                                           |                                                                                                                                                                                |                                                                                              |                                                                                     |
|                                                           |                                                                                                                                                                                |                                                                                              |                                                                                     |
|                                                           |                                                                                                                                                                                |                                                                                              |                                                                                     |
|                                                           |                                                                                                                                                                                |                                                                                              |                                                                                     |
|                                                           |                                                                                                                                                                                |                                                                                              |                                                                                     |
| <b>Time frame: past 36 months</b>                         |                                                                                                                                                                                |                                                                                              |                                                                                     |
| 2                                                         | Grants or contracts from any entity (if not indicated in item #1 above).                                                                                                       | <input type="checkbox"/> None                                                                | Pfizer grants to institution                                                        |
|                                                           |                                                                                                                                                                                |                                                                                              | Merck Sharpe and Dohme- Grants to institution                                       |
|                                                           |                                                                                                                                                                                |                                                                                              | Janssen- grants to institution                                                      |
|                                                           |                                                                                                                                                                                |                                                                                              | BioFire Diagnostics – grant to institution                                          |
| 3                                                         | Royalties or licenses                                                                                                                                                          | <input checked="" type="checkbox"/> None                                                     |                                                                                     |
|                                                           |                                                                                                                                                                                |                                                                                              |                                                                                     |
|                                                           |                                                                                                                                                                                |                                                                                              |                                                                                     |

|    |                                                                                                              |                                          |                                                   |
|----|--------------------------------------------------------------------------------------------------------------|------------------------------------------|---------------------------------------------------|
| 4  | Consulting fees                                                                                              | <input checked="" type="checkbox"/> None |                                                   |
| 5  | Payment or honoraria for lectures, presentations, speakers bureaus, manuscript writing or educational events | <input type="checkbox"/> None            | Manuscript preparation support was provided by AZ |
| 6  | Payment for expert testimony                                                                                 | <input checked="" type="checkbox"/> None |                                                   |
| 7  | Support for attending meetings and/or travel                                                                 | <input checked="" type="checkbox"/> None |                                                   |
| 8  | Patents planned, issued or pending                                                                           | <input checked="" type="checkbox"/> None |                                                   |
| 9  | Participation on a Data Safety Monitoring Board or Advisory Board                                            | <input type="checkbox"/> None            | Novavax - DSMB                                    |
| 10 | Leadership or fiduciary role in other board, society, committee or advocacy group, paid or unpaid            | <input checked="" type="checkbox"/> None |                                                   |
| 11 | Stock or stock options                                                                                       | <input checked="" type="checkbox"/> None |                                                   |
| 12 | Receipt of equipment, materials, drugs, medical writing, gifts or other services                             | <input checked="" type="checkbox"/> None |                                                   |
| 13 | Other financial or non-financial interests                                                                   | <input checked="" type="checkbox"/> None |                                                   |

Please place an "X" next to the following statement to indicate your agreement:

I certify that I have answered every question and have not altered the wording of any of the questions on this form.

*Ann R. Falsey, MD 31 January 2022*

## ICMJE DISCLOSURE FORM

**Date:** February 1, 2022

**Your Name:** Stephanie Sproule

**Manuscript Title:** Durability of protection and immunogenicity of AZD1222 (ChAdOx1 nCoV-19) COVID-19 vaccine: updated results from a randomised, double-blind, placebo-controlled Phase 3 trial

**Manuscript number (if known):** \_\_\_\_\_

In the interest of transparency, we ask you to disclose all relationships/activities/interests listed below that are related to the content of your manuscript. "Related" means any relation with for-profit or not-for-profit third parties whose interests may be affected by the content of the manuscript. Disclosure represents a commitment to transparency and does not necessarily indicate a bias. If you are in doubt about whether to list a relationship/activity/interest, it is preferable that you do so.

The following questions apply to the author's relationships/activities/interests as they relate to the current manuscript only.

The author's relationships/activities/interests should be defined broadly. For example, if your manuscript pertains to the epidemiology of hypertension, you should declare all relationships with manufacturers of antihypertensive medication, even if that medication is not mentioned in the manuscript.

In item #1 below, report all support for the work reported in this manuscript without time limit. For all other items, the time frame for disclosure is the past 36 months.

|                                                           |                                                                                                                                                                                | Name all entities with whom you have this relationship or indicate none (add rows as needed) | Specifications/Comments (e.g., if payments were made to you or to your institution)                                 |
|-----------------------------------------------------------|--------------------------------------------------------------------------------------------------------------------------------------------------------------------------------|----------------------------------------------------------------------------------------------|---------------------------------------------------------------------------------------------------------------------|
| <b>Time frame: Since the initial planning of the work</b> |                                                                                                                                                                                |                                                                                              |                                                                                                                     |
| 1                                                         | All support for the present manuscript (e.g., funding, provision of study materials, medical writing, article processing charges, etc.)<br><b>No time limit for this item.</b> | AstraZeneca                                                                                  | Consultant fees for statistical analysis and reporting. Author is a consultant to AstraZeneca via Joule/System One. |
|                                                           |                                                                                                                                                                                |                                                                                              |                                                                                                                     |
|                                                           |                                                                                                                                                                                |                                                                                              |                                                                                                                     |
|                                                           |                                                                                                                                                                                |                                                                                              |                                                                                                                     |
|                                                           |                                                                                                                                                                                |                                                                                              |                                                                                                                     |
|                                                           |                                                                                                                                                                                |                                                                                              |                                                                                                                     |
| <b>Time frame: past 36 months</b>                         |                                                                                                                                                                                |                                                                                              |                                                                                                                     |
| 2                                                         | Grants or contracts from any entity (if not indicated in item #1 above).                                                                                                       | None                                                                                         |                                                                                                                     |
|                                                           |                                                                                                                                                                                |                                                                                              |                                                                                                                     |
| 3                                                         | Royalties or licenses                                                                                                                                                          | None                                                                                         |                                                                                                                     |
|                                                           |                                                                                                                                                                                |                                                                                              |                                                                                                                     |

|    |                                                                                                              |             |                                                                                                                     |
|----|--------------------------------------------------------------------------------------------------------------|-------------|---------------------------------------------------------------------------------------------------------------------|
| 4  | Consulting fees                                                                                              | AstraZeneca | Consultant fees for statistical analysis and reporting. Author is a consultant to AstraZeneca via Joule/System One. |
|    |                                                                                                              |             |                                                                                                                     |
|    |                                                                                                              |             |                                                                                                                     |
| 5  | Payment or honoraria for lectures, presentations, speakers bureaus, manuscript writing or educational events | ___ None    |                                                                                                                     |
|    |                                                                                                              |             |                                                                                                                     |
|    |                                                                                                              |             |                                                                                                                     |
| 6  | Payment for expert testimony                                                                                 | ___ None    |                                                                                                                     |
|    |                                                                                                              |             |                                                                                                                     |
|    |                                                                                                              |             |                                                                                                                     |
| 7  | Support for attending meetings and/or travel                                                                 | ___ None    |                                                                                                                     |
|    |                                                                                                              |             |                                                                                                                     |
|    |                                                                                                              |             |                                                                                                                     |
| 8  | Patents planned, issued or pending                                                                           | ___ None    |                                                                                                                     |
|    |                                                                                                              |             |                                                                                                                     |
|    |                                                                                                              |             |                                                                                                                     |
| 9  | Participation on a Data Safety Monitoring Board or Advisory Board                                            | ___ None    |                                                                                                                     |
|    |                                                                                                              |             |                                                                                                                     |
|    |                                                                                                              |             |                                                                                                                     |
| 10 | Leadership or fiduciary role in other board, society, committee or advocacy group, paid or unpaid            | ___ None    |                                                                                                                     |
|    |                                                                                                              |             |                                                                                                                     |
|    |                                                                                                              |             |                                                                                                                     |
| 11 | Stock or stock options                                                                                       | ___ None    |                                                                                                                     |
|    |                                                                                                              |             |                                                                                                                     |
|    |                                                                                                              |             |                                                                                                                     |
| 12 | Receipt of equipment, materials, drugs, medical writing, gifts or other services                             | ___ None    |                                                                                                                     |
|    |                                                                                                              | AstraZeneca | Medical writing support – this manuscript                                                                           |
|    |                                                                                                              |             |                                                                                                                     |
| 13 | Other financial or non-financial interests                                                                   | ___ None    |                                                                                                                     |
|    |                                                                                                              |             |                                                                                                                     |
|    |                                                                                                              |             |                                                                                                                     |

Please place an "X" next to the following statement to indicate your agreement:

X  I certify that I have answered every question and have not altered the wording of any of the questions on this form.



**ICMJE DISCLOSURE FORM**

Date: 28 JAN 2022

Your Name: MERLIN L ROBB MD

Manuscript Title: Durability of protection and immunogenicity of AZD1222 (ChAdOx1 nCoV-19) COVID-19 vaccine: updated results from a randomised, double-blind, placebo-controlled Phase 3 trial

Manuscript number (if known): \_\_\_\_\_

In the interest of transparency, we ask you to disclose all relationships/activities/interests listed below that are related to the content of your manuscript. "Related" means any relation with for-profit or not-for-profit third parties whose interests may be affected by the content of the manuscript. Disclosure represents a commitment to transparency and does not necessarily indicate a bias. If you are in doubt about whether to list a relationship/activity/interest, it is preferable that you do so.

The following questions apply to the author's relationships/activities/interests as they relate to the current manuscript only.

The author's relationships/activities/interests should be defined broadly. For example, if your manuscript pertains to the epidemiology of hypertension, you should declare all relationships with manufacturers of antihypertensive medication, even if that medication is not mentioned in the manuscript.

In item #1 below, report all support for the work reported in this manuscript without time limit. For all other items, the time frame for disclosure is the past 36 months.

|                                                    |                                                                                                                                                                                | Name all entities with whom you have this relationship or indicate none (add rows as needed) | Specifications/Comments (e.g., if payments were made to you or to your institution)                                                                                   |
|----------------------------------------------------|--------------------------------------------------------------------------------------------------------------------------------------------------------------------------------|----------------------------------------------------------------------------------------------|-----------------------------------------------------------------------------------------------------------------------------------------------------------------------|
| Time frame: Since the initial planning of the work |                                                                                                                                                                                |                                                                                              |                                                                                                                                                                       |
| 1                                                  | All support for the present manuscript (e.g., funding, provision of study materials, medical writing, article processing charges, etc.)<br><b>No time limit for this item.</b> | None                                                                                         |                                                                                                                                                                       |
|                                                    |                                                                                                                                                                                | WALTER REED ARMY<br>Institute of<br>Research                                                 | Funded to be a consultant for Army<br>And to serve on their behalf in<br>Operation Warp Speed. All work<br>on this manuscript performed as<br>part of that assignment |
|                                                    |                                                                                                                                                                                |                                                                                              |                                                                                                                                                                       |
|                                                    |                                                                                                                                                                                | AstraZeneca                                                                                  | Medical writing support                                                                                                                                               |
| Time frame: past 36 months                         |                                                                                                                                                                                |                                                                                              |                                                                                                                                                                       |
| 2                                                  | Grants or contracts from any entity (if not indicated in item #1 above).                                                                                                       | <input checked="" type="checkbox"/> None                                                     |                                                                                                                                                                       |
| 3                                                  | Royalties or licenses                                                                                                                                                          | <input checked="" type="checkbox"/> None                                                     |                                                                                                                                                                       |
| 4                                                  | Consulting fees                                                                                                                                                                | <input checked="" type="checkbox"/> None                                                     |                                                                                                                                                                       |

*Merlin J Robb MD*  
28 JAN 2022

|    |                                                                                                              |                                          |                                           |
|----|--------------------------------------------------------------------------------------------------------------|------------------------------------------|-------------------------------------------|
| 5  | Payment or honoraria for lectures, presentations, speakers bureaus, manuscript writing or educational events | <input checked="" type="checkbox"/> None |                                           |
| 6  | Payment for expert testimony                                                                                 | <input checked="" type="checkbox"/> None |                                           |
| 7  | Support for attending meetings and/or travel                                                                 | <input checked="" type="checkbox"/> None |                                           |
| 8  | Patents planned, issued or pending                                                                           | <input checked="" type="checkbox"/> None |                                           |
| 9  | Participation on a Data Safety Monitoring Board or Advisory Board                                            | <input checked="" type="checkbox"/> None |                                           |
| 10 | Leadership or fiduciary role in other board, society, committee or advocacy group, paid or unpaid            | <input checked="" type="checkbox"/> None |                                           |
| 11 | Stock or stock options                                                                                       | <input checked="" type="checkbox"/> None |                                           |
| 12 | Receipt of equipment, materials, drugs, medical writing, gifts or other services                             | <input checked="" type="checkbox"/> None |                                           |
|    |                                                                                                              | AstraZeneca                              | Medical writing support – this manuscript |
| 13 | Other financial or non-financial interests                                                                   | <input checked="" type="checkbox"/> None |                                           |

Please place an "X" next to the following statement to indicate your agreement:

I certify that I have answered every question and have not altered the wording of any of the questions on this form.

*Merlin L. Robb, MD*  
 MERLIN L. ROBB, MD  
 28 JAN 2022

## ICMJE DISCLOSURE FORM

**Date:** January 28, 2022

**Your Name:** Robert W. Frenck, Jr, M.D.

**Manuscript Title:** Durability of protection and immunogenicity of AZD1222 (ChAdOx1 nCoV-19) COVID-19 vaccine: updated results from a randomised, double-blind, placebo-controlled Phase 3 trial

**Manuscript number (if known):** \_\_\_\_\_

In the interest of transparency, we ask you to disclose all relationships/activities/interests listed below that are related to the content of your manuscript. "Related" means any relation with for-profit or not-for-profit third parties whose interests may be affected by the content of the manuscript. Disclosure represents a commitment to transparency and does not necessarily indicate a bias. If you are in doubt about whether to list a relationship/activity/interest, it is preferable that you do so.

The following questions apply to the author's relationships/activities/interests as they relate to the **current manuscript only**.

The author's relationships/activities/interests should be **defined broadly**. For example, if your manuscript pertains to the epidemiology of hypertension, you should declare all relationships with manufacturers of antihypertensive medication, even if that medication is not mentioned in the manuscript.

In item #1 below, report all support for the work reported in this manuscript without time limit. For all other items, the time frame for disclosure is the past 36 months.

|                                                           |                                                                                                                                                                                | Name all entities with whom you have this relationship or indicate none (add rows as needed) | Specifications/Comments (e.g., if payments were made to you or to your institution) |
|-----------------------------------------------------------|--------------------------------------------------------------------------------------------------------------------------------------------------------------------------------|----------------------------------------------------------------------------------------------|-------------------------------------------------------------------------------------|
| <b>Time frame: Since the initial planning of the work</b> |                                                                                                                                                                                |                                                                                              |                                                                                     |
| 1                                                         | All support for the present manuscript (e.g., funding, provision of study materials, medical writing, article processing charges, etc.)<br><b>No time limit for this item.</b> | ___ None                                                                                     |                                                                                     |
|                                                           |                                                                                                                                                                                |                                                                                              |                                                                                     |
|                                                           |                                                                                                                                                                                |                                                                                              |                                                                                     |
|                                                           |                                                                                                                                                                                |                                                                                              |                                                                                     |
|                                                           |                                                                                                                                                                                |                                                                                              |                                                                                     |
|                                                           |                                                                                                                                                                                |                                                                                              |                                                                                     |
|                                                           |                                                                                                                                                                                |                                                                                              | AstraZeneca                                                                         |
| <b>Time frame: past 36 months</b>                         |                                                                                                                                                                                |                                                                                              |                                                                                     |
| 2                                                         | Grants or contracts from any entity (if not indicated in item #1 above).                                                                                                       | ___ NIH                                                                                      |                                                                                     |
|                                                           |                                                                                                                                                                                |                                                                                              |                                                                                     |
| 3                                                         | Royalties or licenses                                                                                                                                                          | ___ None                                                                                     |                                                                                     |
|                                                           |                                                                                                                                                                                |                                                                                              |                                                                                     |
| 4                                                         | Consulting fees                                                                                                                                                                | ___ None                                                                                     |                                                                                     |
|                                                           |                                                                                                                                                                                |                                                                                              |                                                                                     |
|                                                           |                                                                                                                                                                                |                                                                                              |                                                                                     |

|    |                                                                                                              |                                 |                                           |
|----|--------------------------------------------------------------------------------------------------------------|---------------------------------|-------------------------------------------|
| 5  | Payment or honoraria for lectures, presentations, speakers bureaus, manuscript writing or educational events | <u>    </u> None                |                                           |
| 6  | Payment for expert testimony                                                                                 | <u>    </u> None                |                                           |
| 7  | Support for attending meetings and/or travel                                                                 | <u>    </u> None                |                                           |
| 8  | Patents planned, issued or pending                                                                           | <u>    </u> None                |                                           |
| 9  | Participation on a Data Safety Monitoring Board or Advisory Board                                            | <u>    </u> None                |                                           |
| 10 | Leadership or fiduciary role in other board, society, committee or advocacy group, paid or unpaid            | <u>    </u> None                |                                           |
| 11 | Stock or stock options                                                                                       | <u>    </u> None                |                                           |
| 12 | Receipt of equipment, materials, drugs, medical writing, gifts or other services                             | <u>    </u> None<br>AstraZeneca | Medical writing support – this manuscript |
| 13 | Other financial or non-financial interests                                                                   | <u>    </u> None                |                                           |

Please place an “X” next to the following statement to indicate your agreement:

  X   I certify that I have answered every question and have not altered the wording of any of the questions on this form.

## ICMJE DISCLOSURE FORM

**Date:** 31 Jan 2022

**Your Name:** Hong Van Tieu

**Manuscript Title:** Durability of protection and immunogenicity of AZD1222 (ChAdOx1 nCoV-19) COVID-19 vaccine: updated results from a randomised, double-blind, placebo-controlled Phase 3 trial

**Manuscript number (if known):** \_\_\_\_\_

In the interest of transparency, we ask you to disclose all relationships/activities/interests listed below that are related to the content of your manuscript. "Related" means any relation with for-profit or not-for-profit third parties whose interests may be affected by the content of the manuscript. Disclosure represents a commitment to transparency and does not necessarily indicate a bias. If you are in doubt about whether to list a relationship/activity/interest, it is preferable that you do so.

The following questions apply to the author's relationships/activities/interests as they relate to the current manuscript only.

The author's relationships/activities/interests should be defined broadly. For example, if your manuscript pertains to the epidemiology of hypertension, you should declare all relationships with manufacturers of antihypertensive medication, even if that medication is not mentioned in the manuscript.

In item #1 below, report all support for the work reported in this manuscript without time limit. For all other items, the time frame for disclosure is the past 36 months.

|                                                           |                                                                                                                                                                                | Name all entities with whom you have this relationship or indicate none (add rows as needed) | Specifications/Comments (e.g., if payments were made to you or to your institution) |
|-----------------------------------------------------------|--------------------------------------------------------------------------------------------------------------------------------------------------------------------------------|----------------------------------------------------------------------------------------------|-------------------------------------------------------------------------------------|
| <b>Time frame: Since the initial planning of the work</b> |                                                                                                                                                                                |                                                                                              |                                                                                     |
| 1                                                         | All support for the present manuscript (e.g., funding, provision of study materials, medical writing, article processing charges, etc.)<br><b>No time limit for this item.</b> | ___ None                                                                                     |                                                                                     |
|                                                           |                                                                                                                                                                                |                                                                                              |                                                                                     |
|                                                           |                                                                                                                                                                                |                                                                                              |                                                                                     |
|                                                           |                                                                                                                                                                                |                                                                                              |                                                                                     |
|                                                           |                                                                                                                                                                                |                                                                                              |                                                                                     |
|                                                           |                                                                                                                                                                                |                                                                                              |                                                                                     |
|                                                           |                                                                                                                                                                                | AstraZeneca                                                                                  | Medical writing support                                                             |
| <b>Time frame: past 36 months</b>                         |                                                                                                                                                                                |                                                                                              |                                                                                     |
| 2                                                         | Grants or contracts from any entity (if not indicated in item #1 above).                                                                                                       | ___ None                                                                                     |                                                                                     |
|                                                           |                                                                                                                                                                                | AstraZeneca/COVPN                                                                            | Grant to conduct the Phase 3 trial at the study site                                |
| 3                                                         | Royalties or licenses                                                                                                                                                          | __X__ None                                                                                   |                                                                                     |
|                                                           |                                                                                                                                                                                |                                                                                              |                                                                                     |
|                                                           |                                                                                                                                                                                |                                                                                              |                                                                                     |
| 4                                                         | Consulting fees                                                                                                                                                                | __X__ None                                                                                   |                                                                                     |
|                                                           |                                                                                                                                                                                |                                                                                              |                                                                                     |
|                                                           |                                                                                                                                                                                |                                                                                              |                                                                                     |

|    |                                                                                                              |                                          |                                                          |
|----|--------------------------------------------------------------------------------------------------------------|------------------------------------------|----------------------------------------------------------|
| 5  | Payment or honoraria for lectures, presentations, speakers bureaus, manuscript writing or educational events | <input checked="" type="checkbox"/> None |                                                          |
| 6  | Payment for expert testimony                                                                                 | <input checked="" type="checkbox"/> None |                                                          |
| 7  | Support for attending meetings and/or travel                                                                 | <input checked="" type="checkbox"/> None |                                                          |
| 8  | Patents planned, issued or pending                                                                           | <input checked="" type="checkbox"/> None |                                                          |
| 9  | Participation on a Data Safety Monitoring Board or Advisory Board                                            | <input checked="" type="checkbox"/> None |                                                          |
| 10 | Leadership or fiduciary role in other board, society, committee or advocacy group, paid or unpaid            | <input checked="" type="checkbox"/> None |                                                          |
| 11 | Stock or stock options                                                                                       | <input checked="" type="checkbox"/> None |                                                          |
| 12 | Receipt of equipment, materials, drugs, medical writing, gifts or other services                             | <input type="checkbox"/> None            | AstraZeneca<br>Medical writing support – this manuscript |
| 13 | Other financial or non-financial interests                                                                   | <input checked="" type="checkbox"/> None |                                                          |

Please place an "X" next to the following statement to indicate your agreement:

I certify that I have answered every question and have not altered the wording of any of the questions on this form.

## ICMJE DISCLOSURE FORM

Date: February 3, 2022

Your

Name: KennethMayer

Manuscript Title: Durability of protection and immunogenicity of AZD1222 (ChAdOx1 nCoV-19) COVID-19 vaccine: updated results from a randomised, double-blind, placebo-controlled Phase 3 trial

Manuscript number (if known): \_\_\_\_\_

In the interest of transparency, we ask you to disclose all relationships/activities/interests listed below that are related to the content of your manuscript. "Related" means any relation with for-profit or not-for-profit third parties whose interests may be affected by the content of the manuscript. Disclosure represents a commitment to transparency and does not necessarily indicate a bias. If you are in doubt about whether to list a relationship/activity/interest, it is preferable that you do so.

The following questions apply to the author's relationships/activities/interests as they relate to the current manuscript only.

The author's relationships/activities/interests should be defined broadly. For example, if your manuscript pertains to the epidemiology of hypertension, you should declare all relationships with manufacturers of antihypertensive medication, even if that medication is not mentioned in the manuscript.

In item #1 below, report all support for the work reported in this manuscript without time limit. For all other items, the time frame for disclosure is the past 36 months.

|                                                           |                                                                                                                                                                                | Name all entities with whom you have this relationship or indicate none (add rows as needed) | Specifications/Comments (e.g., if payments were made to you or to your institution) |
|-----------------------------------------------------------|--------------------------------------------------------------------------------------------------------------------------------------------------------------------------------|----------------------------------------------------------------------------------------------|-------------------------------------------------------------------------------------|
| <b>Time frame: Since the initial planning of the work</b> |                                                                                                                                                                                |                                                                                              |                                                                                     |
| 1                                                         | All support for the present manuscript (e.g., funding, provision of study materials, medical writing, article processing charges, etc.)<br><b>No time limit for this item.</b> | <u>   </u> None                                                                              |                                                                                     |
|                                                           |                                                                                                                                                                                |                                                                                              |                                                                                     |
|                                                           |                                                                                                                                                                                |                                                                                              |                                                                                     |
|                                                           |                                                                                                                                                                                |                                                                                              |                                                                                     |
|                                                           |                                                                                                                                                                                |                                                                                              |                                                                                     |
|                                                           |                                                                                                                                                                                |                                                                                              |                                                                                     |
|                                                           |                                                                                                                                                                                |                                                                                              | AstraZeneca                                                                         |
| <b>Time frame: past 36 months</b>                         |                                                                                                                                                                                |                                                                                              |                                                                                     |
| 2                                                         | Grants or contracts from any entity (if not indicated in item #1 above).                                                                                                       | <u>  x  </u> None                                                                            |                                                                                     |
|                                                           |                                                                                                                                                                                |                                                                                              |                                                                                     |
| 3                                                         | Royalties or licenses                                                                                                                                                          | <u>  x  </u> None                                                                            |                                                                                     |
|                                                           |                                                                                                                                                                                |                                                                                              |                                                                                     |
| 4                                                         | Consulting fees                                                                                                                                                                | <u>  x  </u> None                                                                            |                                                                                     |
|                                                           |                                                                                                                                                                                |                                                                                              |                                                                                     |

|    |                                                                                                              |                                              |                                           |
|----|--------------------------------------------------------------------------------------------------------------|----------------------------------------------|-------------------------------------------|
|    |                                                                                                              |                                              |                                           |
| 5  | Payment or honoraria for lectures, presentations, speakers bureaus, manuscript writing or educational events | <input checked="" type="checkbox"/> None     |                                           |
| 6  | Payment for expert testimony                                                                                 | <input checked="" type="checkbox"/> None     |                                           |
| 7  | Support for attending meetings and/or travel                                                                 | <input checked="" type="checkbox"/> None     |                                           |
| 8  | Patents planned, issued or pending                                                                           | <input checked="" type="checkbox"/> None     |                                           |
| 9  | Participation on a Data Safety Monitoring Board or Advisory Board                                            | <input checked="" type="checkbox"/> None     |                                           |
| 10 | Leadership or fiduciary role in other board, society, committee or advocacy group, paid or unpaid            | <input checked="" type="checkbox"/> None     |                                           |
| 11 | Stock or stock options                                                                                       | <input checked="" type="checkbox"/> None     |                                           |
| 12 | Receipt of equipment, materials, drugs, medical writing, gifts or other services                             | <input type="checkbox"/> None<br>AstraZeneca | Medical writing support – this manuscript |
| 13 | Other financial or non-financial interests                                                                   | <input checked="" type="checkbox"/> None     |                                           |

Please place an “X” next to the following statement to indicate your agreement:

I certify that I have answered every question and have not altered the wording of any of the questions on this form.



## ICMJE DISCLOSURE FORM

Date: 9 March 2022

Your Name: Lawrence Corey

Manuscript Title: Durability of protection and immunogenicity of AZD1222 (ChAdOx1 nCoV-19) COVID-19 vaccine: updated results from a randomised, double-blind, placebo-controlled Phase 3 trial

Manuscript number (if known): \_\_\_\_\_

In the interest of transparency, we ask you to disclose all relationships/activities/interests listed below that are related to the content of your manuscript. "Related" means any relation with for-profit or not-for-profit third parties whose interests may be affected by the content of the manuscript. Disclosure represents a commitment to transparency and does not necessarily indicate a bias. If you are in doubt about whether to list a relationship/activity/interest, it is preferable that you do so.

The following questions apply to the author's relationships/activities/interests as they relate to the **current manuscript only**.

The author's relationships/activities/interests should be **defined broadly**. For example, if your manuscript pertains to the epidemiology of hypertension, you should declare all relationships with manufacturers of antihypertensive medication, even if that medication is not mentioned in the manuscript.

In item #1 below, report all support for the work reported in this manuscript without time limit. For all other items, the time frame for disclosure is the past 36 months.

|                                                           |                                                                                                                                                                                | Name all entities with whom you have this relationship or indicate none (add rows as needed) | Specifications/Comments (e.g., if payments were made to you or to your institution) |
|-----------------------------------------------------------|--------------------------------------------------------------------------------------------------------------------------------------------------------------------------------|----------------------------------------------------------------------------------------------|-------------------------------------------------------------------------------------|
| <b>Time frame: Since the initial planning of the work</b> |                                                                                                                                                                                |                                                                                              |                                                                                     |
| 1                                                         | All support for the present manuscript (e.g., funding, provision of study materials, medical writing, article processing charges, etc.)<br><b>No time limit for this item.</b> | ___ None                                                                                     |                                                                                     |
|                                                           |                                                                                                                                                                                | NIH                                                                                          | Support for the study via a grant from the NIH                                      |
|                                                           |                                                                                                                                                                                |                                                                                              |                                                                                     |
|                                                           |                                                                                                                                                                                |                                                                                              |                                                                                     |
|                                                           |                                                                                                                                                                                |                                                                                              |                                                                                     |
|                                                           |                                                                                                                                                                                | AstraZeneca                                                                                  | Medical writing support                                                             |
| <b>Time frame: past 36 months</b>                         |                                                                                                                                                                                |                                                                                              |                                                                                     |
| 2                                                         | Grants or contracts from any entity (if not indicated in item #1 above).                                                                                                       | __x__ None                                                                                   |                                                                                     |
| 3                                                         | Royalties or licenses                                                                                                                                                          | __x__ None                                                                                   |                                                                                     |
| 4                                                         | Consulting fees                                                                                                                                                                | __x__ None                                                                                   |                                                                                     |

|    |                                                                                                              |                                                         |                                           |
|----|--------------------------------------------------------------------------------------------------------------|---------------------------------------------------------|-------------------------------------------|
| 5  | Payment or honoraria for lectures, presentations, speakers bureaus, manuscript writing or educational events | <input checked="" type="checkbox"/> None                |                                           |
| 6  | Payment for expert testimony                                                                                 | <input checked="" type="checkbox"/> None                |                                           |
| 7  | Support for attending meetings and/or travel                                                                 | <input checked="" type="checkbox"/> None                |                                           |
| 8  | Patents planned, issued or pending                                                                           | <input checked="" type="checkbox"/> None                |                                           |
| 9  | Participation on a Data Safety Monitoring Board or Advisory Board                                            | <input checked="" type="checkbox"/> None                |                                           |
| 10 | Leadership or fiduciary role in other board, society, committee or advocacy group, paid or unpaid            | <input checked="" type="checkbox"/> None                |                                           |
| 11 | Stock or stock options                                                                                       | <input checked="" type="checkbox"/> None                |                                           |
| 12 | Receipt of equipment, materials, drugs, medical writing, gifts or other services                             | <input checked="" type="checkbox"/> None<br>AstraZeneca | Medical writing support – this manuscript |
| 13 | Other financial or non-financial interests                                                                   | <input checked="" type="checkbox"/> None                |                                           |

Please place an “X” next to the following statement to indicate your agreement:

I certify that I have answered every question and have not altered the wording of any of the questions on this form.

## ICMJE DISCLOSURE FORM

Date: 1-28-2022

Your Name: Dr. Kathleen Neuzil

Manuscript Title: Durability of protection and immunogenicity of AZD1222 (ChAdOx1 nCoV-19) COVID-19 vaccine: updated results from a randomised, double-blind, placebo-controlled Phase 3 trial

Manuscript number (if known): \_\_\_\_\_

In the interest of transparency, we ask you to disclose all relationships/activities/interests listed below that are related to the content of your manuscript. "Related" means any relation with for-profit or not-for-profit third parties whose interests may be affected by the content of the manuscript. Disclosure represents a commitment to transparency and does not necessarily indicate a bias. If you are in doubt about whether to list a relationship/activity/interest, it is preferable that you do so.

The following questions apply to the author's relationships/activities/interests as they relate to the **current manuscript only**.

The author's relationships/activities/interests should be **defined broadly**. For example, if your manuscript pertains to the epidemiology of hypertension, you should declare all relationships with manufacturers of antihypertensive medication, even if that medication is not mentioned in the manuscript.

In item #1 below, report all support for the work reported in this manuscript without time limit. For all other items, the time frame for disclosure is the past 36 months.

|                                                           |                                                                                                                                                                                | Name all entities with whom you have this relationship or indicate none (add rows as needed) | Specifications/Comments (e.g., if payments were made to you or to your institution)                                                                                                    |
|-----------------------------------------------------------|--------------------------------------------------------------------------------------------------------------------------------------------------------------------------------|----------------------------------------------------------------------------------------------|----------------------------------------------------------------------------------------------------------------------------------------------------------------------------------------|
| <b>Time frame: Since the initial planning of the work</b> |                                                                                                                                                                                |                                                                                              |                                                                                                                                                                                        |
| 1                                                         | All support for the present manuscript (e.g., funding, provision of study materials, medical writing, article processing charges, etc.)<br><b>No time limit for this item.</b> | ___ None                                                                                     |                                                                                                                                                                                        |
|                                                           |                                                                                                                                                                                |                                                                                              |                                                                                                                                                                                        |
|                                                           |                                                                                                                                                                                |                                                                                              |                                                                                                                                                                                        |
|                                                           |                                                                                                                                                                                |                                                                                              |                                                                                                                                                                                        |
|                                                           |                                                                                                                                                                                |                                                                                              |                                                                                                                                                                                        |
|                                                           |                                                                                                                                                                                |                                                                                              |                                                                                                                                                                                        |
|                                                           |                                                                                                                                                                                |                                                                                              |                                                                                                                                                                                        |
|                                                           |                                                                                                                                                                                |                                                                                              | AstraZeneca                                                                                                                                                                            |
| <b>Time frame: past 36 months</b>                         |                                                                                                                                                                                |                                                                                              |                                                                                                                                                                                        |
| 2                                                         | Grants or contracts from any entity (if not indicated in item #1 above).                                                                                                       | ___ Pfizer                                                                                   | Center for Vaccine Development and Global Health (CVD) receives grants from Pfizer to conduct clinical trials of COVID vaccines. Dr. Neuzil receives no salary support for this grant. |
|                                                           |                                                                                                                                                                                | NIH                                                                                          | Dr. Neuzil receives grants from NIH to participate in overall organization of COVID vaccine trials and for participation in vaccine trails.                                            |
|                                                           |                                                                                                                                                                                |                                                                                              |                                                                                                                                                                                        |
| 3                                                         | Royalties or licenses                                                                                                                                                          | ___ None                                                                                     |                                                                                                                                                                                        |

|    |                                                                                                              |             |                                           |
|----|--------------------------------------------------------------------------------------------------------------|-------------|-------------------------------------------|
|    |                                                                                                              |             |                                           |
| 4  | Consulting fees                                                                                              | ___ None    |                                           |
| 5  | Payment or honoraria for lectures, presentations, speakers bureaus, manuscript writing or educational events | ___ None    |                                           |
| 6  | Payment for expert testimony                                                                                 | ___ None    |                                           |
| 7  | Support for attending meetings and/or travel                                                                 | ___ None    |                                           |
| 8  | Patents planned, issued or pending                                                                           | ___ None    |                                           |
| 9  | Participation on a Data Safety Monitoring Board or Advisory Board                                            | ___ None    |                                           |
| 10 | Leadership or fiduciary role in other board, society, committee or advocacy group, paid or unpaid            | ___ None    |                                           |
| 11 | Stock or stock options                                                                                       | ___ None    |                                           |
| 12 | Receipt of equipment, materials, drugs, medical writing, gifts or other services                             | ___ None    |                                           |
|    |                                                                                                              | AstraZeneca | Medical writing support – this manuscript |
| 13 | Other financial or non-financial interests                                                                   | ___ None    |                                           |

Please place an "X" next to the following statement to indicate your agreement:

X I certify that I have answered every question and have not altered the wording of any of the questions on this form.

## ICMJE DISCLOSURE FORM

**Date:** February 16, 2022

**Your Name:** Tina L. Tong

**Manuscript Title:** Durability of protection and immunogenicity of AZD1222 (ChAdOx1 nCoV-19) COVID-19 vaccine: updated results from a randomised, double-blind, placebo-controlled Phase 3 trial

**Manuscript number (if known):** \_\_\_\_\_

In the interest of transparency, we ask you to disclose all relationships/activities/interests listed below that are related to the content of your manuscript. "Related" means any relation with for-profit or not-for-profit third parties whose interests may be affected by the content of the manuscript. Disclosure represents a commitment to transparency and does not necessarily indicate a bias. If you are in doubt about whether to list a relationship/activity/interest, it is preferable that you do so.

The following questions apply to the author's relationships/activities/interests as they relate to the current manuscript only.

The author's relationships/activities/interests should be defined broadly. For example, if your manuscript pertains to the epidemiology of hypertension, you should declare all relationships with manufacturers of antihypertensive medication, even if that medication is not mentioned in the manuscript.

In item #1 below, report all support for the work reported in this manuscript without time limit. For all other items, the time frame for disclosure is the past 36 months.

|                                                           |                                                                                                                                                                                | Name all entities with whom you have this relationship or indicate none (add rows as needed) | Specifications/Comments (e.g., if payments were made to you or to your institution) |
|-----------------------------------------------------------|--------------------------------------------------------------------------------------------------------------------------------------------------------------------------------|----------------------------------------------------------------------------------------------|-------------------------------------------------------------------------------------|
| <b>Time frame: Since the initial planning of the work</b> |                                                                                                                                                                                |                                                                                              |                                                                                     |
| 1                                                         | All support for the present manuscript (e.g., funding, provision of study materials, medical writing, article processing charges, etc.)<br><b>No time limit for this item.</b> | <input checked="" type="checkbox"/> None                                                     |                                                                                     |
|                                                           |                                                                                                                                                                                |                                                                                              |                                                                                     |
|                                                           |                                                                                                                                                                                |                                                                                              |                                                                                     |
|                                                           |                                                                                                                                                                                |                                                                                              |                                                                                     |
|                                                           |                                                                                                                                                                                |                                                                                              |                                                                                     |
|                                                           |                                                                                                                                                                                |                                                                                              |                                                                                     |
|                                                           |                                                                                                                                                                                |                                                                                              | AstraZeneca                                                                         |
| <b>Time frame: past 36 months</b>                         |                                                                                                                                                                                |                                                                                              |                                                                                     |
| 2                                                         | Grants or contracts from any entity (if not indicated in item #1 above).                                                                                                       | <input checked="" type="checkbox"/> None                                                     |                                                                                     |
|                                                           |                                                                                                                                                                                |                                                                                              |                                                                                     |
| 3                                                         | Royalties or licenses                                                                                                                                                          | <input checked="" type="checkbox"/> None                                                     |                                                                                     |
|                                                           |                                                                                                                                                                                |                                                                                              |                                                                                     |
| 4                                                         | Consulting fees                                                                                                                                                                | <input checked="" type="checkbox"/> None                                                     |                                                                                     |
|                                                           |                                                                                                                                                                                |                                                                                              |                                                                                     |
|                                                           |                                                                                                                                                                                |                                                                                              |                                                                                     |

|    |                                                                                                              |                                          |                                           |
|----|--------------------------------------------------------------------------------------------------------------|------------------------------------------|-------------------------------------------|
| 5  | Payment or honoraria for lectures, presentations, speakers bureaus, manuscript writing or educational events | <input checked="" type="checkbox"/> None |                                           |
|    |                                                                                                              |                                          |                                           |
|    |                                                                                                              |                                          |                                           |
| 6  | Payment for expert testimony                                                                                 | <input checked="" type="checkbox"/> None |                                           |
|    |                                                                                                              |                                          |                                           |
|    |                                                                                                              |                                          |                                           |
| 7  | Support for attending meetings and/or travel                                                                 | <input checked="" type="checkbox"/> None |                                           |
|    |                                                                                                              |                                          |                                           |
|    |                                                                                                              |                                          |                                           |
| 8  | Patents planned, issued or pending                                                                           | <input checked="" type="checkbox"/> None |                                           |
|    |                                                                                                              |                                          |                                           |
|    |                                                                                                              |                                          |                                           |
| 9  | Participation on a Data Safety Monitoring Board or Advisory Board                                            | <input checked="" type="checkbox"/> None |                                           |
|    |                                                                                                              |                                          |                                           |
|    |                                                                                                              |                                          |                                           |
| 10 | Leadership or fiduciary role in other board, society, committee or advocacy group, paid or unpaid            | <input checked="" type="checkbox"/> None |                                           |
|    |                                                                                                              |                                          |                                           |
|    |                                                                                                              |                                          |                                           |
| 11 | Stock or stock options                                                                                       | <input checked="" type="checkbox"/> None |                                           |
|    |                                                                                                              |                                          |                                           |
|    |                                                                                                              |                                          |                                           |
| 12 | Receipt of equipment, materials, drugs, medical writing, gifts or other services                             | <input checked="" type="checkbox"/> None |                                           |
|    |                                                                                                              | AstraZeneca                              | Medical writing support – this manuscript |
|    |                                                                                                              |                                          |                                           |
| 13 | Other financial or non-financial interests                                                                   | <input checked="" type="checkbox"/> None |                                           |
|    |                                                                                                              |                                          |                                           |
|    |                                                                                                              |                                          |                                           |

Please place an “X” next to the following statement to indicate your agreement:

I certify that I have answered every question and have not altered the wording of any of the questions on this form.

## ICMJE DISCLOSURE FORM

**Date:** 02/04/2022

**Your Name:** Margaret Brewinski Isaacs

**Manuscript Title:** Durability of protection and immunogenicity of AZD1222 (ChAdOx1 nCoV-19) COVID-19 vaccine: updated results from a randomised, double-blind, placebo-controlled Phase 3 trial

**Manuscript number (if known):** \_\_\_\_\_

In the interest of transparency, we ask you to disclose all relationships/activities/interests listed below that are related to the content of your manuscript. "Related" means any relation with for-profit or not-for-profit third parties whose interests may be affected by the content of the manuscript. Disclosure represents a commitment to transparency and does not necessarily indicate a bias. If you are in doubt about whether to list a relationship/activity/interest, it is preferable that you do so.

The following questions apply to the author's relationships/activities/interests as they relate to the **current manuscript only**.

The author's relationships/activities/interests should be **defined broadly**. For example, if your manuscript pertains to the epidemiology of hypertension, you should declare all relationships with manufacturers of antihypertensive medication, even if that medication is not mentioned in the manuscript.

In item #1 below, report all support for the work reported in this manuscript without time limit. For all other items, the time frame for disclosure is the past 36 months.

|                                                           |                                                                                                                                                                                | Name all entities with whom you have this relationship or indicate none (add rows as needed) | Specifications/Comments (e.g., if payments were made to you or to your institution)                                                                                                |
|-----------------------------------------------------------|--------------------------------------------------------------------------------------------------------------------------------------------------------------------------------|----------------------------------------------------------------------------------------------|------------------------------------------------------------------------------------------------------------------------------------------------------------------------------------|
| <b>Time frame: Since the initial planning of the work</b> |                                                                                                                                                                                |                                                                                              |                                                                                                                                                                                    |
| 1                                                         | All support for the present manuscript (e.g., funding, provision of study materials, medical writing, article processing charges, etc.)<br><b>No time limit for this item.</b> | NIAID                                                                                        | I was a federal employee of NIH/NIAID during the clinical trial and drafting of this manuscript. I served as the primary medical officer assigned to the trial on behalf of NIAID. |
|                                                           |                                                                                                                                                                                | AstraZeneca                                                                                  | Medical writing support                                                                                                                                                            |
| <b>Time frame: past 36 months</b>                         |                                                                                                                                                                                |                                                                                              |                                                                                                                                                                                    |
| 2                                                         | Grants or contracts from any entity (if not indicated in item #1 above).                                                                                                       | None                                                                                         |                                                                                                                                                                                    |
| 3                                                         | Royalties or licenses                                                                                                                                                          | None                                                                                         |                                                                                                                                                                                    |
| 4                                                         | Consulting fees                                                                                                                                                                | None                                                                                         |                                                                                                                                                                                    |
| 5                                                         | Payment or honoraria for lectures, presentations,                                                                                                                              | None                                                                                         |                                                                                                                                                                                    |

|    |                                                                                                   |             |                                           |
|----|---------------------------------------------------------------------------------------------------|-------------|-------------------------------------------|
|    | speakers bureaus, manuscript writing or educational events                                        |             |                                           |
| 6  | Payment for expert testimony                                                                      | ___ None    |                                           |
|    |                                                                                                   |             |                                           |
|    |                                                                                                   |             |                                           |
| 7  | Support for attending meetings and/or travel                                                      | ___ None    |                                           |
|    |                                                                                                   |             |                                           |
|    |                                                                                                   |             |                                           |
| 8  | Patents planned, issued or pending                                                                | ___ None    |                                           |
|    |                                                                                                   |             |                                           |
|    |                                                                                                   |             |                                           |
| 9  | Participation on a Data Safety Monitoring Board or Advisory Board                                 | ___ None    |                                           |
|    |                                                                                                   |             |                                           |
|    |                                                                                                   |             |                                           |
| 10 | Leadership or fiduciary role in other board, society, committee or advocacy group, paid or unpaid | ___ None    |                                           |
|    |                                                                                                   |             |                                           |
|    |                                                                                                   |             |                                           |
| 11 | Stock or stock options                                                                            | ___ None    |                                           |
|    |                                                                                                   |             |                                           |
|    |                                                                                                   |             |                                           |
| 12 | Receipt of equipment, materials, drugs, medical writing, gifts or other services                  | ___ None    |                                           |
|    |                                                                                                   | AstraZeneca | Medical writing support – this manuscript |
| 13 | Other financial or non-financial interests                                                        | ___ None    |                                           |
|    |                                                                                                   |             |                                           |
|    |                                                                                                   |             |                                           |

Please place an “X” next to the following statement to indicate your agreement:

I certify that I have answered every question and have not altered the wording of any of the questions on this form.



## ICMJE DISCLOSURE FORM

**Date:** 02/03/2022

**Your Name:** Holly Janes

**Manuscript Title:** Durability of protection and immunogenicity of AZD1222 (ChAdOx1 nCoV-19) COVID-19 vaccine: updated results from a randomised, double-blind, placebo-controlled Phase 3 trial

**Manuscript number (if known):** \_\_\_\_\_

In the interest of transparency, we ask you to disclose all relationships/activities/interests listed below that are related to the content of your manuscript. "Related" means any relation with for-profit or not-for-profit third parties whose interests may be affected by the content of the manuscript. Disclosure represents a commitment to transparency and does not necessarily indicate a bias. If you are in doubt about whether to list a relationship/activity/interest, it is preferable that you do so.

The following questions apply to the author's relationships/activities/interests as they relate to the current manuscript only.

The author's relationships/activities/interests should be defined broadly. For example, if your manuscript pertains to the epidemiology of hypertension, you should declare all relationships with manufacturers of antihypertensive medication, even if that medication is not mentioned in the manuscript.

In item #1 below, report all support for the work reported in this manuscript without time limit. For all other items, the time frame for disclosure is the past 36 months.

|                                                           |                                                                                                                                                                                | Name all entities with whom you have this relationship or indicate none (add rows as needed) | Specifications/Comments (e.g., if payments were made to you or to your institution) |
|-----------------------------------------------------------|--------------------------------------------------------------------------------------------------------------------------------------------------------------------------------|----------------------------------------------------------------------------------------------|-------------------------------------------------------------------------------------|
| <b>Time frame: Since the initial planning of the work</b> |                                                                                                                                                                                |                                                                                              |                                                                                     |
| 1                                                         | All support for the present manuscript (e.g., funding, provision of study materials, medical writing, article processing charges, etc.)<br><b>No time limit for this item.</b> | ___ None                                                                                     |                                                                                     |
|                                                           |                                                                                                                                                                                | NIH/NIAID                                                                                    | Payments to my institution                                                          |
|                                                           |                                                                                                                                                                                |                                                                                              |                                                                                     |
|                                                           |                                                                                                                                                                                |                                                                                              |                                                                                     |
|                                                           |                                                                                                                                                                                |                                                                                              |                                                                                     |
|                                                           |                                                                                                                                                                                |                                                                                              |                                                                                     |
|                                                           |                                                                                                                                                                                | AstraZeneca                                                                                  | Medical writing support                                                             |
| <b>Time frame: past 36 months</b>                         |                                                                                                                                                                                |                                                                                              |                                                                                     |
| 2                                                         | Grants or contracts from any entity (if not indicated in item #1 above).                                                                                                       | ___ None                                                                                     |                                                                                     |
|                                                           |                                                                                                                                                                                | NIH/NCI                                                                                      | Payments to my institution                                                          |
|                                                           |                                                                                                                                                                                |                                                                                              |                                                                                     |
| 3                                                         | Royalties or licenses                                                                                                                                                          | __X__ None                                                                                   |                                                                                     |
|                                                           |                                                                                                                                                                                |                                                                                              |                                                                                     |
|                                                           |                                                                                                                                                                                |                                                                                              |                                                                                     |
| 4                                                         | Consulting fees                                                                                                                                                                | __X__ None                                                                                   |                                                                                     |
|                                                           |                                                                                                                                                                                |                                                                                              |                                                                                     |
|                                                           |                                                                                                                                                                                |                                                                                              |                                                                                     |

|    |                                                                                                              |                                          |                                           |
|----|--------------------------------------------------------------------------------------------------------------|------------------------------------------|-------------------------------------------|
| 5  | Payment or honoraria for lectures, presentations, speakers bureaus, manuscript writing or educational events | <input checked="" type="checkbox"/> None |                                           |
|    |                                                                                                              |                                          |                                           |
|    |                                                                                                              |                                          |                                           |
| 6  | Payment for expert testimony                                                                                 | <input checked="" type="checkbox"/> None |                                           |
|    |                                                                                                              |                                          |                                           |
|    |                                                                                                              |                                          |                                           |
| 7  | Support for attending meetings and/or travel                                                                 | <input checked="" type="checkbox"/> None |                                           |
|    |                                                                                                              |                                          |                                           |
|    |                                                                                                              |                                          |                                           |
| 8  | Patents planned, issued or pending                                                                           | <input checked="" type="checkbox"/> None |                                           |
|    |                                                                                                              |                                          |                                           |
|    |                                                                                                              |                                          |                                           |
| 9  | Participation on a Data Safety Monitoring Board or Advisory Board                                            | <input checked="" type="checkbox"/> None |                                           |
|    |                                                                                                              |                                          |                                           |
|    |                                                                                                              |                                          |                                           |
| 10 | Leadership or fiduciary role in other board, society, committee or advocacy group, paid or unpaid            | <input checked="" type="checkbox"/> None |                                           |
|    |                                                                                                              |                                          |                                           |
|    |                                                                                                              |                                          |                                           |
| 11 | Stock or stock options                                                                                       | <input checked="" type="checkbox"/> None |                                           |
|    |                                                                                                              |                                          |                                           |
|    |                                                                                                              |                                          |                                           |
| 12 | Receipt of equipment, materials, drugs, medical writing, gifts or other services                             | <input type="checkbox"/> None            |                                           |
|    |                                                                                                              | AstraZeneca                              | Medical writing support – this manuscript |
|    |                                                                                                              |                                          |                                           |
| 13 | Other financial or non-financial interests                                                                   | <input checked="" type="checkbox"/> None |                                           |
|    |                                                                                                              |                                          |                                           |
|    |                                                                                                              |                                          |                                           |

Please place an "X" next to the following statement to indicate your agreement:

I certify that I have answered every question and have not altered the wording of any of the questions on this form.

## ICMJE DISCLOSURE FORM

Date: HIMANSHU BANSAL January 31, 2022  
 Your Name: January 31, 2022 HIMANSHU BANSAL Himanshu Bansal Jan 31, 2022  
 Manuscript Title: Durability of protection and immunogenicity of AZD1222 (ChAdOx1 nCoV-19) COVID-19 vaccine: updated results from a randomised, double-blind, placebo-controlled Phase 3 trial  
 Manuscript number (if known): \_\_\_\_\_

In the interest of transparency, we ask you to disclose all relationships/activities/interests listed below that are related to the content of your manuscript. "Related" means any relation with for-profit or not-for-profit third parties whose interests may be affected by the content of the manuscript. Disclosure represents a commitment to transparency and does not necessarily indicate a bias. If you are in doubt about whether to list a relationship/activity/interest, it is preferable that you do so.

The following questions apply to the author's relationships/activities/interests as they relate to the current manuscript only.

The author's relationships/activities/interests should be defined broadly. For example, if your manuscript pertains to the epidemiology of hypertension, you should declare all relationships with manufacturers of antihypertensive medication, even if that medication is not mentioned in the manuscript.

In item #1 below, report all support for the work reported in this manuscript without time limit. For all other items, the time frame for disclosure is the past 36 months.

|                                                           |                                                                                                                                                                                | Name all entities with whom you have this relationship or indicate none (add rows as needed) | Specifications/Comments (e.g., if payments were made to you or to your institution) |
|-----------------------------------------------------------|--------------------------------------------------------------------------------------------------------------------------------------------------------------------------------|----------------------------------------------------------------------------------------------|-------------------------------------------------------------------------------------|
| <b>Time frame: Since the initial planning of the work</b> |                                                                                                                                                                                |                                                                                              |                                                                                     |
| 1                                                         | All support for the present manuscript (e.g., funding, provision of study materials, medical writing, article processing charges, etc.)<br><b>No time limit for this item.</b> | <input checked="" type="checkbox"/> None                                                     |                                                                                     |
|                                                           |                                                                                                                                                                                |                                                                                              |                                                                                     |
|                                                           |                                                                                                                                                                                |                                                                                              |                                                                                     |
|                                                           |                                                                                                                                                                                |                                                                                              |                                                                                     |
|                                                           |                                                                                                                                                                                | AstraZeneca                                                                                  | Medical writing support                                                             |
| <b>Time frame: past 36 months</b>                         |                                                                                                                                                                                |                                                                                              |                                                                                     |
| 2                                                         | Grants or contracts from any entity (if not indicated in item #1 above).                                                                                                       | <input checked="" type="checkbox"/> None                                                     |                                                                                     |
| 3                                                         | Royalties or licenses                                                                                                                                                          | <input checked="" type="checkbox"/> None                                                     |                                                                                     |
| 4                                                         | Consulting fees                                                                                                                                                                | <input checked="" type="checkbox"/> None                                                     |                                                                                     |

|    |                                                                                                              |                                                         |                                           |
|----|--------------------------------------------------------------------------------------------------------------|---------------------------------------------------------|-------------------------------------------|
| 5  | Payment or honoraria for lectures, presentations, speakers bureaus, manuscript writing or educational events | <input checked="" type="checkbox"/> None                |                                           |
| 6  | Payment for expert testimony                                                                                 | <input checked="" type="checkbox"/> None                |                                           |
| 7  | Support for attending meetings and/or travel                                                                 | <input checked="" type="checkbox"/> None                |                                           |
| 8  | Patents planned, issued or pending                                                                           | <input checked="" type="checkbox"/> None                |                                           |
| 9  | Participation on a Data Safety Monitoring Board or Advisory Board                                            | <input checked="" type="checkbox"/> None                |                                           |
| 10 | Leadership or fiduciary role in other board, society, committee or advocacy group, paid or unpaid            | <input checked="" type="checkbox"/> None                |                                           |
| 11 | Stock or stock options                                                                                       | <input checked="" type="checkbox"/> None                |                                           |
| 12 | Receipt of equipment, materials, drugs, medical writing, gifts or other services                             | <input checked="" type="checkbox"/> None<br>AstraZeneca | Medical writing support – this manuscript |
| 13 | Other financial or non-financial interests                                                                   | <input checked="" type="checkbox"/> None                |                                           |

Please place an "X" next to the following statement to indicate your agreement:

I certify that I have answered every question and have not altered the wording of any of the questions on this form.

*Himanshu Bansal*  
*January 31, 2022*

## ICMJE DISCLOSURE FORM

Date: 24<sup>th</sup> Feb 2022

Your Name: Dr Lindsay M Edwards

Manuscript Title: Durability of protection and immunogenicity of AZD1222 (ChAdOx1 nCoV-19) COVID-19 vaccine: updated results from a randomised, double-blind, placebo-controlled Phase 3 trial

Manuscript number (if known): \_\_\_\_\_

In the interest of transparency, we ask you to disclose all relationships/activities/interests listed below that are related to the content of your manuscript. "Related" means any relation with for-profit or not-for-profit third parties whose interests may be affected by the content of the manuscript. Disclosure represents a commitment to transparency and does not necessarily indicate a bias. If you are in doubt about whether to list a relationship/activity/interest, it is preferable that you do so.

The following questions apply to the author's relationships/activities/interests as they relate to the **current manuscript only**.

The author's relationships/activities/interests should be **defined broadly**. For example, if your manuscript pertains to the epidemiology of hypertension, you should declare all relationships with manufacturers of antihypertensive medication, even if that medication is not mentioned in the manuscript.

In item #1 below, report all support for the work reported in this manuscript without time limit. For all other items, the time frame for disclosure is the past 36 months.

|                                                           |                                                                                                                                                                                | Name all entities with whom you have this relationship or indicate none (add rows as needed) | Specifications/Comments (e.g., if payments were made to you or to your institution) |
|-----------------------------------------------------------|--------------------------------------------------------------------------------------------------------------------------------------------------------------------------------|----------------------------------------------------------------------------------------------|-------------------------------------------------------------------------------------|
| <b>Time frame: Since the initial planning of the work</b> |                                                                                                                                                                                |                                                                                              |                                                                                     |
| 1                                                         | All support for the present manuscript (e.g., funding, provision of study materials, medical writing, article processing charges, etc.)<br><b>No time limit for this item.</b> | AstraZeneca                                                                                  | Former employee                                                                     |
|                                                           |                                                                                                                                                                                |                                                                                              |                                                                                     |
|                                                           |                                                                                                                                                                                |                                                                                              |                                                                                     |
|                                                           |                                                                                                                                                                                |                                                                                              |                                                                                     |
|                                                           |                                                                                                                                                                                |                                                                                              |                                                                                     |
|                                                           |                                                                                                                                                                                |                                                                                              |                                                                                     |
|                                                           |                                                                                                                                                                                |                                                                                              | AstraZeneca                                                                         |
| <b>Time frame: past 36 months</b>                         |                                                                                                                                                                                |                                                                                              |                                                                                     |
| 2                                                         | Grants or contracts from any entity (if not indicated in item #1 above).                                                                                                       | ___ None                                                                                     |                                                                                     |
|                                                           |                                                                                                                                                                                |                                                                                              |                                                                                     |
|                                                           |                                                                                                                                                                                |                                                                                              |                                                                                     |
| 3                                                         | Royalties or licenses                                                                                                                                                          | ___ None                                                                                     |                                                                                     |
|                                                           |                                                                                                                                                                                |                                                                                              |                                                                                     |
|                                                           |                                                                                                                                                                                |                                                                                              |                                                                                     |
| 4                                                         | Consulting fees                                                                                                                                                                | ___ None                                                                                     |                                                                                     |
|                                                           |                                                                                                                                                                                |                                                                                              |                                                                                     |
|                                                           |                                                                                                                                                                                |                                                                                              |                                                                                     |

|    |                                                                                                              |             |                                           |
|----|--------------------------------------------------------------------------------------------------------------|-------------|-------------------------------------------|
| 5  | Payment or honoraria for lectures, presentations, speakers bureaus, manuscript writing or educational events | ___ None    |                                           |
| 6  | Payment for expert testimony                                                                                 | ___ None    |                                           |
| 7  | Support for attending meetings and/or travel                                                                 | ___ None    |                                           |
| 8  | Patents planned, issued or pending                                                                           | ___ None    |                                           |
| 9  | Participation on a Data Safety Monitoring Board or Advisory Board                                            | ___ None    |                                           |
| 10 | Leadership or fiduciary role in other board, society, committee or advocacy group, paid or unpaid            | ___ None    |                                           |
| 11 | Stock or stock options                                                                                       | ___ None    |                                           |
| 12 | Receipt of equipment, materials, drugs, medical writing, gifts or other services                             | ___ None    |                                           |
|    |                                                                                                              | AstraZeneca | Medical writing support – this manuscript |
| 13 | Other financial or non-financial interests                                                                   | ___ None    |                                           |

Please place an “X” next to the following statement to indicate your agreement:

X\_ I certify that I have answered every question and have not altered the wording of any of the questions on this form.

## ICMJE DISCLOSURE FORM

Date: 03Feb2022

Your Name: Justin Green

Manuscript Title: Durability of protection and immunogenicity of AZD1222 (ChAdOx1 nCoV-19) COVID-19 vaccine: updated results from a randomised, double-blind, placebo-controlled Phase 3 trial

Manuscript number (if known): \_\_\_\_\_

In the interest of transparency, we ask you to disclose all relationships/activities/interests listed below that are related to the content of your manuscript. "Related" means any relation with for-profit or not-for-profit third parties whose interests may be affected by the content of the manuscript. Disclosure represents a commitment to transparency and does not necessarily indicate a bias. If you are in doubt about whether to list a relationship/activity/interest, it is preferable that you do so.

The following questions apply to the author's relationships/activities/interests as they relate to the **current manuscript only**.

The author's relationships/activities/interests should be **defined broadly**. For example, if your manuscript pertains to the epidemiology of hypertension, you should declare all relationships with manufacturers of antihypertensive medication, even if that medication is not mentioned in the manuscript.

In item #1 below, report all support for the work reported in this manuscript without time limit. For all other items, the time frame for disclosure is the past 36 months.

|                                                           |                                                                                                                                                                                | Name all entities with whom you have this relationship or indicate none (add rows as needed) | Specifications/Comments (e.g., if payments were made to you or to your institution) |
|-----------------------------------------------------------|--------------------------------------------------------------------------------------------------------------------------------------------------------------------------------|----------------------------------------------------------------------------------------------|-------------------------------------------------------------------------------------|
| <b>Time frame: Since the initial planning of the work</b> |                                                                                                                                                                                |                                                                                              |                                                                                     |
| 1                                                         | All support for the present manuscript (e.g., funding, provision of study materials, medical writing, article processing charges, etc.)<br><b>No time limit for this item.</b> | ___ None                                                                                     |                                                                                     |
|                                                           |                                                                                                                                                                                |                                                                                              |                                                                                     |
|                                                           |                                                                                                                                                                                |                                                                                              |                                                                                     |
|                                                           |                                                                                                                                                                                |                                                                                              |                                                                                     |
|                                                           |                                                                                                                                                                                |                                                                                              |                                                                                     |
|                                                           |                                                                                                                                                                                |                                                                                              |                                                                                     |
|                                                           |                                                                                                                                                                                |                                                                                              | AstraZeneca                                                                         |
| <b>Time frame: past 36 months</b>                         |                                                                                                                                                                                |                                                                                              |                                                                                     |
| 2                                                         | Grants or contracts from any entity (if not indicated in item #1 above).                                                                                                       | __X__ None                                                                                   |                                                                                     |
|                                                           |                                                                                                                                                                                |                                                                                              |                                                                                     |
| 3                                                         | Royalties or licenses                                                                                                                                                          | __X__ None                                                                                   |                                                                                     |
|                                                           |                                                                                                                                                                                |                                                                                              |                                                                                     |
| 4                                                         | Consulting fees                                                                                                                                                                | __X__ None                                                                                   |                                                                                     |
|                                                           |                                                                                                                                                                                |                                                                                              |                                                                                     |
|                                                           |                                                                                                                                                                                |                                                                                              |                                                                                     |

|    |                                                                                                              |                                          |                                           |
|----|--------------------------------------------------------------------------------------------------------------|------------------------------------------|-------------------------------------------|
| 5  | Payment or honoraria for lectures, presentations, speakers bureaus, manuscript writing or educational events | <input checked="" type="checkbox"/> None |                                           |
|    |                                                                                                              |                                          |                                           |
|    |                                                                                                              |                                          |                                           |
| 6  | Payment for expert testimony                                                                                 | <input checked="" type="checkbox"/> None |                                           |
|    |                                                                                                              |                                          |                                           |
|    |                                                                                                              |                                          |                                           |
| 7  | Support for attending meetings and/or travel                                                                 | <input checked="" type="checkbox"/> None |                                           |
|    |                                                                                                              |                                          |                                           |
|    |                                                                                                              |                                          |                                           |
| 8  | Patents planned, issued or pending                                                                           | <input checked="" type="checkbox"/> None |                                           |
|    |                                                                                                              |                                          |                                           |
|    |                                                                                                              |                                          |                                           |
| 9  | Participation on a Data Safety Monitoring Board or Advisory Board                                            | <input checked="" type="checkbox"/> None |                                           |
|    |                                                                                                              |                                          |                                           |
|    |                                                                                                              |                                          |                                           |
| 10 | Leadership or fiduciary role in other board, society, committee or advocacy group, paid or unpaid            | <input checked="" type="checkbox"/> None |                                           |
|    |                                                                                                              |                                          |                                           |
|    |                                                                                                              |                                          |                                           |
| 11 | Stock or stock options                                                                                       | <input type="checkbox"/> None            |                                           |
|    |                                                                                                              |                                          |                                           |
|    |                                                                                                              | AstraZeneca                              | Employee with stock options               |
| 12 | Receipt of equipment, materials, drugs, medical writing, gifts or other services                             | <input type="checkbox"/> None            |                                           |
|    |                                                                                                              |                                          |                                           |
|    |                                                                                                              | AstraZeneca                              | Medical writing support – this manuscript |
| 13 | Other financial or non-financial interests                                                                   | <input type="checkbox"/> None            |                                           |
|    |                                                                                                              |                                          |                                           |
|    |                                                                                                              | AstraZeneca                              | Employee                                  |

Please place an "X" next to the following statement to indicate your agreement:

I certify that I have answered every question and have not altered the wording of any of the questions on this form.



## ICMJE DISCLOSURE FORM

Date: 3 Feb 2022

Your Name: Elizabeth J. Kelly

Manuscript Title: Durability of protection and immunogenicity of AZD1222 (ChAdOx1 nCoV-19) COVID-19 vaccine: updated results from a randomised, double-blind, placebo-controlled Phase 3 trial

Manuscript number (if known): \_\_\_\_\_

In the interest of transparency, we ask you to disclose all relationships/activities/interests listed below that are related to the content of your manuscript. "Related" means any relation with for-profit or not-for-profit third parties whose interests may be affected by the content of the manuscript. Disclosure represents a commitment to transparency and does not necessarily indicate a bias. If you are in doubt about whether to list a relationship/activity/interest, it is preferable that you do so.

The following questions apply to the author's relationships/activities/interests as they relate to the **current manuscript only**.

The author's relationships/activities/interests should be **defined broadly**. For example, if your manuscript pertains to the epidemiology of hypertension, you should declare all relationships with manufacturers of antihypertensive medication, even if that medication is not mentioned in the manuscript.

In item #1 below, report all support for the work reported in this manuscript without time limit. For all other items, the time frame for disclosure is the past 36 months.

|                                                           |                                                                                                                                                                                | Name all entities with whom you have this relationship or indicate none (add rows as needed) | Specifications/Comments (e.g., if payments were made to you or to your institution) |
|-----------------------------------------------------------|--------------------------------------------------------------------------------------------------------------------------------------------------------------------------------|----------------------------------------------------------------------------------------------|-------------------------------------------------------------------------------------|
| <b>Time frame: Since the initial planning of the work</b> |                                                                                                                                                                                |                                                                                              |                                                                                     |
| 1                                                         | All support for the present manuscript (e.g., funding, provision of study materials, medical writing, article processing charges, etc.)<br><b>No time limit for this item.</b> | None                                                                                         |                                                                                     |
|                                                           |                                                                                                                                                                                |                                                                                              |                                                                                     |
|                                                           |                                                                                                                                                                                |                                                                                              |                                                                                     |
|                                                           |                                                                                                                                                                                |                                                                                              |                                                                                     |
|                                                           |                                                                                                                                                                                |                                                                                              |                                                                                     |
|                                                           |                                                                                                                                                                                |                                                                                              |                                                                                     |
|                                                           |                                                                                                                                                                                | AstraZeneca                                                                                  | Medical writing support                                                             |
| <b>Time frame: past 36 months</b>                         |                                                                                                                                                                                |                                                                                              |                                                                                     |
| 2                                                         | Grants or contracts from any entity (if not indicated in item #1 above).                                                                                                       | None                                                                                         |                                                                                     |
|                                                           |                                                                                                                                                                                |                                                                                              |                                                                                     |
|                                                           |                                                                                                                                                                                |                                                                                              |                                                                                     |
| 3                                                         | Royalties or licenses                                                                                                                                                          | None                                                                                         |                                                                                     |
|                                                           |                                                                                                                                                                                |                                                                                              |                                                                                     |
|                                                           |                                                                                                                                                                                |                                                                                              |                                                                                     |
| 4                                                         | Consulting fees                                                                                                                                                                | None                                                                                         |                                                                                     |
|                                                           |                                                                                                                                                                                |                                                                                              |                                                                                     |
|                                                           |                                                                                                                                                                                |                                                                                              |                                                                                     |

|    |                                                                                                              |                 |                                           |
|----|--------------------------------------------------------------------------------------------------------------|-----------------|-------------------------------------------|
| 5  | Payment or honoraria for lectures, presentations, speakers bureaus, manuscript writing or educational events | ___ None        |                                           |
|    |                                                                                                              |                 |                                           |
|    |                                                                                                              |                 |                                           |
| 6  | Payment for expert testimony                                                                                 | ___ None        |                                           |
|    |                                                                                                              |                 |                                           |
|    |                                                                                                              |                 |                                           |
| 7  | Support for attending meetings and/or travel                                                                 | ___ None        |                                           |
|    |                                                                                                              |                 |                                           |
|    |                                                                                                              |                 |                                           |
| 8  | Patents planned, issued or pending                                                                           | ___ None        |                                           |
|    |                                                                                                              |                 |                                           |
|    |                                                                                                              |                 |                                           |
| 9  | Participation on a Data Safety Monitoring Board or Advisory Board                                            | ___ None        |                                           |
|    |                                                                                                              |                 |                                           |
|    |                                                                                                              |                 |                                           |
| 10 | Leadership or fiduciary role in other board, society, committee or advocacy group, paid or unpaid            | ___ None        |                                           |
|    |                                                                                                              |                 |                                           |
|    |                                                                                                              |                 |                                           |
| 11 | Stock or stock options                                                                                       | ___ AstraZeneca | Holds AstraZeneca stock                   |
|    |                                                                                                              |                 |                                           |
|    |                                                                                                              |                 |                                           |
| 12 | Receipt of equipment, materials, drugs, medical writing, gifts or other services                             | ___ None        |                                           |
|    |                                                                                                              | AstraZeneca     | Medical writing support – this manuscript |
|    |                                                                                                              |                 |                                           |
| 13 | Other financial or non-financial interests                                                                   | ___ AstraZeneca | Employee of AstraZeneca                   |
|    |                                                                                                              |                 |                                           |
|    |                                                                                                              |                 |                                           |

Please place an “X” next to the following statement to indicate your agreement:

  X   I certify that I have answered every question and have not altered the wording of any of the questions on this form.

## ICMJE DISCLOSURE FORM

Date: 9 March 2022

Your Name: Kathryn Shoemaker

Manuscript Title: Durability of protection and immunogenicity of AZD1222 (ChAdOx1 nCoV-19) COVID-19 vaccine: updated results from a randomised, double-blind, placebo-controlled Phase 3 trial

Manuscript number (if known): \_\_\_\_\_

In the interest of transparency, we ask you to disclose all relationships/activities/interests listed below that are related to the content of your manuscript. "Related" means any relation with for-profit or not-for-profit third parties whose interests may be affected by the content of the manuscript. Disclosure represents a commitment to transparency and does not necessarily indicate a bias. If you are in doubt about whether to list a relationship/activity/interest, it is preferable that you do so.

The following questions apply to the author's relationships/activities/interests as they relate to the current manuscript only.

The author's relationships/activities/interests should be defined broadly. For example, if your manuscript pertains to the epidemiology of hypertension, you should declare all relationships with manufacturers of antihypertensive medication, even if that medication is not mentioned in the manuscript.

In item #1 below, report all support for the work reported in this manuscript without time limit. For all other items, the time frame for disclosure is the past 36 months.

|                                                           |                                                                                                                                                                                | Name all entities with whom you have this relationship or indicate none (add rows as needed) | Specifications/Comments (e.g., if payments were made to you or to your institution) |
|-----------------------------------------------------------|--------------------------------------------------------------------------------------------------------------------------------------------------------------------------------|----------------------------------------------------------------------------------------------|-------------------------------------------------------------------------------------|
| <b>Time frame: Since the initial planning of the work</b> |                                                                                                                                                                                |                                                                                              |                                                                                     |
| 1                                                         | All support for the present manuscript (e.g., funding, provision of study materials, medical writing, article processing charges, etc.)<br><b>No time limit for this item.</b> | ___ None                                                                                     |                                                                                     |
|                                                           |                                                                                                                                                                                |                                                                                              |                                                                                     |
|                                                           |                                                                                                                                                                                |                                                                                              |                                                                                     |
|                                                           |                                                                                                                                                                                |                                                                                              |                                                                                     |
|                                                           |                                                                                                                                                                                |                                                                                              |                                                                                     |
|                                                           |                                                                                                                                                                                |                                                                                              |                                                                                     |
|                                                           |                                                                                                                                                                                | AstraZeneca                                                                                  | Medical writing support                                                             |
| <b>Time frame: past 36 months</b>                         |                                                                                                                                                                                |                                                                                              |                                                                                     |
| 2                                                         | Grants or contracts from any entity (if not indicated in item #1 above).                                                                                                       | __x__ None                                                                                   |                                                                                     |
|                                                           |                                                                                                                                                                                |                                                                                              |                                                                                     |
| 3                                                         | Royalties or licenses                                                                                                                                                          | __x__ None                                                                                   |                                                                                     |
|                                                           |                                                                                                                                                                                |                                                                                              |                                                                                     |
| 4                                                         | Consulting fees                                                                                                                                                                | __x__ None                                                                                   |                                                                                     |
|                                                           |                                                                                                                                                                                |                                                                                              |                                                                                     |
|                                                           |                                                                                                                                                                                |                                                                                              |                                                                                     |

|    |                                                                                                              |                                              |                                           |
|----|--------------------------------------------------------------------------------------------------------------|----------------------------------------------|-------------------------------------------|
| 5  | Payment or honoraria for lectures, presentations, speakers bureaus, manuscript writing or educational events | <input checked="" type="checkbox"/> None     |                                           |
| 6  | Payment for expert testimony                                                                                 | <input checked="" type="checkbox"/> None     |                                           |
| 7  | Support for attending meetings and/or travel                                                                 | <input checked="" type="checkbox"/> None     |                                           |
| 8  | Patents planned, issued or pending                                                                           | <input checked="" type="checkbox"/> None     |                                           |
| 9  | Participation on a Data Safety Monitoring Board or Advisory Board                                            | <input checked="" type="checkbox"/> None     |                                           |
| 10 | Leadership or fiduciary role in other board, society, committee or advocacy group, paid or unpaid            | <input checked="" type="checkbox"/> None     |                                           |
| 11 | Stock or stock options                                                                                       | AstraZeneca                                  |                                           |
| 12 | Receipt of equipment, materials, drugs, medical writing, gifts or other services                             | <input type="checkbox"/> None<br>AstraZeneca | Medical writing support – this manuscript |
| 13 | Other financial or non-financial interests                                                                   | AstraZeneca                                  | Employee of AstraZeneca                   |

Please place an “X” next to the following statement to indicate your agreement:

I certify that I have answered every question and have not altered the wording of any of the questions on this form.

## ICMJE DISCLOSURE FORM

Date: 03Feb2022

Your Name: Therese Takas

Manuscript Title: Durability of protection and immunogenicity of AZD1222 (ChAdOx1 nCoV-19) COVID-19 vaccine: updated results from a randomised, double-blind, placebo-controlled Phase 3 trial

Manuscript number (if known): \_\_\_\_\_

In the interest of transparency, we ask you to disclose all relationships/activities/interests listed below that are related to the content of your manuscript. "Related" means any relation with for-profit or not-for-profit third parties whose interests may be affected by the content of the manuscript. Disclosure represents a commitment to transparency and does not necessarily indicate a bias. If you are in doubt about whether to list a relationship/activity/interest, it is preferable that you do so.

The following questions apply to the author's relationships/activities/interests as they relate to the current manuscript only.

The author's relationships/activities/interests should be defined broadly. For example, if your manuscript pertains to the epidemiology of hypertension, you should declare all relationships with manufacturers of antihypertensive medication, even if that medication is not mentioned in the manuscript.

In item #1 below, report all support for the work reported in this manuscript without time limit. For all other items, the time frame for disclosure is the past 36 months.

|                                                           |                                                                                                                                                                                | Name all entities with whom you have this relationship or indicate none (add rows as needed) | Specifications/Comments (e.g., if payments were made to you or to your institution) |
|-----------------------------------------------------------|--------------------------------------------------------------------------------------------------------------------------------------------------------------------------------|----------------------------------------------------------------------------------------------|-------------------------------------------------------------------------------------|
| <b>Time frame: Since the initial planning of the work</b> |                                                                                                                                                                                |                                                                                              |                                                                                     |
| 1                                                         | All support for the present manuscript (e.g., funding, provision of study materials, medical writing, article processing charges, etc.)<br><b>No time limit for this item.</b> | <u>None</u>                                                                                  |                                                                                     |
|                                                           |                                                                                                                                                                                |                                                                                              |                                                                                     |
|                                                           |                                                                                                                                                                                |                                                                                              |                                                                                     |
|                                                           |                                                                                                                                                                                |                                                                                              |                                                                                     |
|                                                           |                                                                                                                                                                                |                                                                                              |                                                                                     |
|                                                           |                                                                                                                                                                                |                                                                                              |                                                                                     |
|                                                           |                                                                                                                                                                                |                                                                                              | AstraZeneca                                                                         |
| <b>Time frame: past 36 months</b>                         |                                                                                                                                                                                |                                                                                              |                                                                                     |
| 2                                                         | Grants or contracts from any entity (if not indicated in item #1 above).                                                                                                       | <u>X</u> None                                                                                |                                                                                     |
|                                                           |                                                                                                                                                                                |                                                                                              |                                                                                     |
| 3                                                         | Royalties or licenses                                                                                                                                                          | <u>X</u> None                                                                                |                                                                                     |
|                                                           |                                                                                                                                                                                |                                                                                              |                                                                                     |
| 4                                                         | Consulting fees                                                                                                                                                                | <u>X</u> None                                                                                |                                                                                     |
|                                                           |                                                                                                                                                                                |                                                                                              |                                                                                     |

|    |                                                                                                              |                                          |                                           |
|----|--------------------------------------------------------------------------------------------------------------|------------------------------------------|-------------------------------------------|
| 5  | Payment or honoraria for lectures, presentations, speakers bureaus, manuscript writing or educational events | <input checked="" type="checkbox"/> None |                                           |
|    |                                                                                                              |                                          |                                           |
|    |                                                                                                              |                                          |                                           |
| 6  | Payment for expert testimony                                                                                 | <input checked="" type="checkbox"/> None |                                           |
|    |                                                                                                              |                                          |                                           |
|    |                                                                                                              |                                          |                                           |
| 7  | Support for attending meetings and/or travel                                                                 | <input checked="" type="checkbox"/> None |                                           |
|    |                                                                                                              |                                          |                                           |
|    |                                                                                                              |                                          |                                           |
| 8  | Patents planned, issued or pending                                                                           | <input checked="" type="checkbox"/> None |                                           |
|    |                                                                                                              |                                          |                                           |
|    |                                                                                                              |                                          |                                           |
| 9  | Participation on a Data Safety Monitoring Board or Advisory Board                                            | <input checked="" type="checkbox"/> None |                                           |
|    |                                                                                                              |                                          |                                           |
|    |                                                                                                              |                                          |                                           |
| 10 | Leadership or fiduciary role in other board, society, committee or advocacy group, paid or unpaid            | <input checked="" type="checkbox"/> None |                                           |
|    |                                                                                                              |                                          |                                           |
|    |                                                                                                              |                                          |                                           |
| 11 | Stock or stock options                                                                                       | <input type="checkbox"/> None            |                                           |
|    |                                                                                                              |                                          |                                           |
|    |                                                                                                              | AstraZeneca                              | Employee with stock options               |
| 12 | Receipt of equipment, materials, drugs, medical writing, gifts or other services                             | <input type="checkbox"/> None            |                                           |
|    |                                                                                                              |                                          |                                           |
|    |                                                                                                              | AstraZeneca                              | Medical writing support – this manuscript |
| 13 | Other financial or non-financial interests                                                                   | <input type="checkbox"/> None            |                                           |
|    |                                                                                                              |                                          |                                           |
|    |                                                                                                              | AstraZeneca                              | Employee                                  |

Please place an "X" next to the following statement to indicate your agreement:

I certify that I have answered every question and have not altered the wording of any of the questions on this form.

## ICMJE DISCLOSURE FORM

Date: 31/Jan/2022

Your Name: Thomas White

Manuscript Title: Durability of protection and immunogenicity of AZD1222 (ChAdOx1 nCoV-19) COVID-19 vaccine: updated results from a randomised, double-blind, placebo-controlled Phase 3 trial

Manuscript number (if known): \_\_\_\_\_

In the interest of transparency, we ask you to disclose all relationships/activities/interests listed below that are related to the content of your manuscript. "Related" means any relation with for-profit or not-for-profit third parties whose interests may be affected by the content of the manuscript. Disclosure represents a commitment to transparency and does not necessarily indicate a bias. If you are in doubt about whether to list a relationship/activity/interest, it is preferable that you do so.

The following questions apply to the author's relationships/activities/interests as they relate to the **current manuscript only**.

The author's relationships/activities/interests should be **defined broadly**. For example, if your manuscript pertains to the epidemiology of hypertension, you should declare all relationships with manufacturers of antihypertensive medication, even if that medication is not mentioned in the manuscript.

In item #1 below, report all support for the work reported in this manuscript without time limit. For all other items, the time frame for disclosure is the past 36 months.

|                                                           |                                                                                                                                                                                | Name all entities with whom you have this relationship or indicate none (add rows as needed) | Specifications/Comments (e.g., if payments were made to you or to your institution) |
|-----------------------------------------------------------|--------------------------------------------------------------------------------------------------------------------------------------------------------------------------------|----------------------------------------------------------------------------------------------|-------------------------------------------------------------------------------------|
| <b>Time frame: Since the initial planning of the work</b> |                                                                                                                                                                                |                                                                                              |                                                                                     |
| 1                                                         | All support for the present manuscript (e.g., funding, provision of study materials, medical writing, article processing charges, etc.)<br><b>No time limit for this item.</b> | ___ None                                                                                     |                                                                                     |
|                                                           |                                                                                                                                                                                | AstraZeneca                                                                                  | Employee/shares                                                                     |
|                                                           |                                                                                                                                                                                |                                                                                              |                                                                                     |
|                                                           |                                                                                                                                                                                |                                                                                              |                                                                                     |
|                                                           |                                                                                                                                                                                |                                                                                              |                                                                                     |
|                                                           |                                                                                                                                                                                |                                                                                              |                                                                                     |
| <b>Time frame: past 36 months</b>                         |                                                                                                                                                                                |                                                                                              |                                                                                     |
| 2                                                         | Grants or contracts from any entity (if not indicated in item #1 above).                                                                                                       | ___ None                                                                                     |                                                                                     |
|                                                           |                                                                                                                                                                                |                                                                                              |                                                                                     |
| 3                                                         | Royalties or licenses                                                                                                                                                          | ___ None                                                                                     |                                                                                     |
|                                                           |                                                                                                                                                                                |                                                                                              |                                                                                     |
| 4                                                         | Consulting fees                                                                                                                                                                | ___ None                                                                                     |                                                                                     |
|                                                           |                                                                                                                                                                                |                                                                                              |                                                                                     |
|                                                           |                                                                                                                                                                                |                                                                                              |                                                                                     |

|    |                                                                                                              |             |                 |
|----|--------------------------------------------------------------------------------------------------------------|-------------|-----------------|
| 5  | Payment or honoraria for lectures, presentations, speakers bureaus, manuscript writing or educational events | ___ None    |                 |
|    |                                                                                                              |             |                 |
|    |                                                                                                              |             |                 |
| 6  | Payment for expert testimony                                                                                 | ___ None    |                 |
|    |                                                                                                              |             |                 |
|    |                                                                                                              |             |                 |
| 7  | Support for attending meetings and/or travel                                                                 | ___ None    |                 |
|    |                                                                                                              |             |                 |
|    |                                                                                                              |             |                 |
| 8  | Patents planned, issued or pending                                                                           | ___ None    |                 |
|    |                                                                                                              |             |                 |
|    |                                                                                                              |             |                 |
| 9  | Participation on a Data Safety Monitoring Board or Advisory Board                                            | ___ None    |                 |
|    |                                                                                                              |             |                 |
|    |                                                                                                              |             |                 |
| 10 | Leadership or fiduciary role in other board, society, committee or advocacy group, paid or unpaid            | ___ None    |                 |
|    |                                                                                                              |             |                 |
|    |                                                                                                              |             |                 |
| 11 | Stock or stock options                                                                                       | ___ None    |                 |
|    |                                                                                                              | AstraZeneca | Employee/shares |
|    |                                                                                                              |             |                 |
| 12 | Receipt of equipment, materials, drugs, medical writing, gifts or other services                             | ___ None    |                 |
|    |                                                                                                              |             |                 |
|    |                                                                                                              |             |                 |
| 13 | Other financial or non-financial interests                                                                   | ___ None    |                 |
|    |                                                                                                              |             |                 |
|    |                                                                                                              |             |                 |

Please place an "X" next to the following statement to indicate your agreement:

  X   I certify that I have answered every question and have not altered the wording of any of the questions on this form.



## ICMJE DISCLOSURE FORM

Date: 03-FEB-2022

Your Name: Prakash Bhuyan, MD PhD

Manuscript Title: Durability of protection and immunogenicity of AZD1222 (ChAdOx1 nCoV-19) COVID-19 vaccine: updated results from a randomised, double-blind, placebo-controlled Phase 3 trial

Manuscript number (if known): \_\_\_\_\_

In the interest of transparency, we ask you to disclose all relationships/activities/interests listed below that are related to the content of your manuscript. "Related" means any relation with for-profit or not-for-profit third parties whose interests may be affected by the content of the manuscript. Disclosure represents a commitment to transparency and does not necessarily indicate a bias. If you are in doubt about whether to list a relationship/activity/interest, it is preferable that you do so.

The following questions apply to the author's relationships/activities/interests as they relate to the **current manuscript only**.

The author's relationships/activities/interests should be **defined broadly**. For example, if your manuscript pertains to the epidemiology of hypertension, you should declare all relationships with manufacturers of antihypertensive medication, even if that medication is not mentioned in the manuscript.

In item #1 below, report all support for the work reported in this manuscript without time limit. For all other items, the time frame for disclosure is the past 36 months.

|                                                           |                                                                                                                                                                                | Name all entities with whom you have this relationship or indicate none (add rows as needed) | Specifications/Comments (e.g., if payments were made to you or to your institution) |
|-----------------------------------------------------------|--------------------------------------------------------------------------------------------------------------------------------------------------------------------------------|----------------------------------------------------------------------------------------------|-------------------------------------------------------------------------------------|
| <b>Time frame: Since the initial planning of the work</b> |                                                                                                                                                                                |                                                                                              |                                                                                     |
| 1                                                         | All support for the present manuscript (e.g., funding, provision of study materials, medical writing, article processing charges, etc.)<br><b>No time limit for this item.</b> | ___ None                                                                                     |                                                                                     |
|                                                           |                                                                                                                                                                                |                                                                                              |                                                                                     |
|                                                           |                                                                                                                                                                                |                                                                                              |                                                                                     |
|                                                           |                                                                                                                                                                                |                                                                                              |                                                                                     |
|                                                           |                                                                                                                                                                                |                                                                                              |                                                                                     |
|                                                           |                                                                                                                                                                                |                                                                                              |                                                                                     |
|                                                           |                                                                                                                                                                                |                                                                                              | AstraZeneca                                                                         |
| <b>Time frame: past 36 months</b>                         |                                                                                                                                                                                |                                                                                              |                                                                                     |
| 2                                                         | Grants or contracts from any entity (if not indicated in item #1 above).                                                                                                       | ___ None                                                                                     |                                                                                     |
|                                                           |                                                                                                                                                                                |                                                                                              |                                                                                     |
| 3                                                         | Royalties or licenses                                                                                                                                                          | ___ None                                                                                     |                                                                                     |
|                                                           |                                                                                                                                                                                |                                                                                              |                                                                                     |
| 4                                                         | Consulting fees                                                                                                                                                                | ___ None                                                                                     |                                                                                     |
|                                                           |                                                                                                                                                                                |                                                                                              |                                                                                     |
|                                                           |                                                                                                                                                                                |                                                                                              |                                                                                     |

|    |                                                                                                              |             |                                           |
|----|--------------------------------------------------------------------------------------------------------------|-------------|-------------------------------------------|
| 5  | Payment or honoraria for lectures, presentations, speakers bureaus, manuscript writing or educational events | ___ None    |                                           |
| 6  | Payment for expert testimony                                                                                 | ___ None    |                                           |
| 7  | Support for attending meetings and/or travel                                                                 | ___ None    |                                           |
| 8  | Patents planned, issued or pending                                                                           | ___ None    |                                           |
| 9  | Participation on a Data Safety Monitoring Board or Advisory Board                                            | ___ None    |                                           |
| 10 | Leadership or fiduciary role in other board, society, committee or advocacy group, paid or unpaid            | ___ None    |                                           |
| 11 | Stock or stock options                                                                                       | ___ None    |                                           |
| 12 | Receipt of equipment, materials, drugs, medical writing, gifts or other services                             | ___ None    |                                           |
|    |                                                                                                              | AstraZeneca | Medical writing support – this manuscript |
| 13 | Other financial or non-financial interests                                                                   | ___ None    |                                           |

Please place an “X” next to the following statement to indicate your agreement:

X  I certify that I have answered every question and have not altered the wording of any of the questions on this form.

## ICMJE DISCLOSURE FORM

Date: 31/Jan/2022

Your Name: Tonya Villafana

Manuscript Title: Durability of protection and immunogenicity of AZD1222 (ChAdOx1 nCoV-19) COVID-19 vaccine: updated results from a randomised, double-blind, placebo-controlled Phase 3 trial

Manuscript number (if known): \_\_\_\_\_

In the interest of transparency, we ask you to disclose all relationships/activities/interests listed below that are related to the content of your manuscript. "Related" means any relation with for-profit or not-for-profit third parties whose interests may be affected by the content of the manuscript. Disclosure represents a commitment to transparency and does not necessarily indicate a bias. If you are in doubt about whether to list a relationship/activity/interest, it is preferable that you do so.

The following questions apply to the author's relationships/activities/interests as they relate to the **current manuscript only**.

The author's relationships/activities/interests should be **defined broadly**. For example, if your manuscript pertains to the epidemiology of hypertension, you should declare all relationships with manufacturers of antihypertensive medication, even if that medication is not mentioned in the manuscript.

In item #1 below, report all support for the work reported in this manuscript without time limit. For all other items, the time frame for disclosure is the past 36 months.

|                                                           |                                                                                                                                                                                | Name all entities with whom you have this relationship or indicate none (add rows as needed) | Specifications/Comments (e.g., if payments were made to you or to your institution) |
|-----------------------------------------------------------|--------------------------------------------------------------------------------------------------------------------------------------------------------------------------------|----------------------------------------------------------------------------------------------|-------------------------------------------------------------------------------------|
| <b>Time frame: Since the initial planning of the work</b> |                                                                                                                                                                                |                                                                                              |                                                                                     |
| 1                                                         | All support for the present manuscript (e.g., funding, provision of study materials, medical writing, article processing charges, etc.)<br><b>No time limit for this item.</b> | ___ None                                                                                     |                                                                                     |
|                                                           |                                                                                                                                                                                | AstraZeneca                                                                                  | Employee/shares                                                                     |
|                                                           |                                                                                                                                                                                |                                                                                              |                                                                                     |
|                                                           |                                                                                                                                                                                |                                                                                              |                                                                                     |
|                                                           |                                                                                                                                                                                |                                                                                              |                                                                                     |
|                                                           |                                                                                                                                                                                |                                                                                              |                                                                                     |
| <b>Time frame: past 36 months</b>                         |                                                                                                                                                                                |                                                                                              |                                                                                     |
| 2                                                         | Grants or contracts from any entity (if not indicated in item #1 above).                                                                                                       | ___ None                                                                                     |                                                                                     |
|                                                           |                                                                                                                                                                                |                                                                                              |                                                                                     |
| 3                                                         | Royalties or licenses                                                                                                                                                          | ___ None                                                                                     |                                                                                     |
|                                                           |                                                                                                                                                                                |                                                                                              |                                                                                     |
| 4                                                         | Consulting fees                                                                                                                                                                | ___ None                                                                                     |                                                                                     |
|                                                           |                                                                                                                                                                                |                                                                                              |                                                                                     |
|                                                           |                                                                                                                                                                                |                                                                                              |                                                                                     |

|    |                                                                                                              |             |                 |
|----|--------------------------------------------------------------------------------------------------------------|-------------|-----------------|
| 5  | Payment or honoraria for lectures, presentations, speakers bureaus, manuscript writing or educational events | ___ None    |                 |
|    |                                                                                                              |             |                 |
|    |                                                                                                              |             |                 |
| 6  | Payment for expert testimony                                                                                 | ___ None    |                 |
|    |                                                                                                              |             |                 |
|    |                                                                                                              |             |                 |
| 7  | Support for attending meetings and/or travel                                                                 | ___ None    |                 |
|    |                                                                                                              |             |                 |
|    |                                                                                                              |             |                 |
| 8  | Patents planned, issued or pending                                                                           | ___ None    |                 |
|    |                                                                                                              |             |                 |
|    |                                                                                                              |             |                 |
| 9  | Participation on a Data Safety Monitoring Board or Advisory Board                                            | ___ None    |                 |
|    |                                                                                                              |             |                 |
|    |                                                                                                              |             |                 |
| 10 | Leadership or fiduciary role in other board, society, committee or advocacy group, paid or unpaid            | ___ None    |                 |
|    |                                                                                                              |             |                 |
|    |                                                                                                              |             |                 |
| 11 | Stock or stock options                                                                                       | ___ None    |                 |
|    |                                                                                                              | AstraZeneca | Employee/shares |
|    |                                                                                                              |             |                 |
| 12 | Receipt of equipment, materials, drugs, medical writing, gifts or other services                             | ___ None    |                 |
|    |                                                                                                              |             |                 |
|    |                                                                                                              |             |                 |
| 13 | Other financial or non-financial interests                                                                   | ___ None    |                 |
|    |                                                                                                              |             |                 |
|    |                                                                                                              |             |                 |

Please place an "X" next to the following statement to indicate your agreement:

  X   I certify that I have answered every question and have not altered the wording of any of the questions on this form.

## ICMJE DISCLOSURE FORM

Date: 3<sup>rd</sup> Feb 2022

Your Name: Ian Hirsch

Manuscript Title: Durability of protection and immunogenicity of AZD1222 (ChAdOx1 nCoV-19) COVID-19 vaccine: updated results from a randomised, double-blind, placebo-controlled Phase 3 trial

Manuscript number (if known): \_\_\_\_\_

In the interest of transparency, we ask you to disclose all relationships/activities/interests listed below that are related to the content of your manuscript. "Related" means any relation with for-profit or not-for-profit third parties whose interests may be affected by the content of the manuscript. Disclosure represents a commitment to transparency and does not necessarily indicate a bias. If you are in doubt about whether to list a relationship/activity/interest, it is preferable that you do so.

The following questions apply to the author's relationships/activities/interests as they relate to the **current manuscript only**.

The author's relationships/activities/interests should be **defined broadly**. For example, if your manuscript pertains to the epidemiology of hypertension, you should declare all relationships with manufacturers of antihypertensive medication, even if that medication is not mentioned in the manuscript.

In item #1 below, report all support for the work reported in this manuscript without time limit. For all other items, the time frame for disclosure is the past 36 months.

|                                                           |                                                                                                                                                                                | Name all entities with whom you have this relationship or indicate none (add rows as needed) | Specifications/Comments (e.g., if payments were made to you or to your institution) |
|-----------------------------------------------------------|--------------------------------------------------------------------------------------------------------------------------------------------------------------------------------|----------------------------------------------------------------------------------------------|-------------------------------------------------------------------------------------|
| <b>Time frame: Since the initial planning of the work</b> |                                                                                                                                                                                |                                                                                              |                                                                                     |
| 1                                                         | All support for the present manuscript (e.g., funding, provision of study materials, medical writing, article processing charges, etc.)<br><b>No time limit for this item.</b> | None                                                                                         |                                                                                     |
|                                                           |                                                                                                                                                                                |                                                                                              |                                                                                     |
|                                                           |                                                                                                                                                                                |                                                                                              |                                                                                     |
|                                                           |                                                                                                                                                                                |                                                                                              |                                                                                     |
|                                                           |                                                                                                                                                                                |                                                                                              |                                                                                     |
|                                                           |                                                                                                                                                                                |                                                                                              |                                                                                     |
|                                                           |                                                                                                                                                                                |                                                                                              | AstraZeneca                                                                         |
| <b>Time frame: past 36 months</b>                         |                                                                                                                                                                                |                                                                                              |                                                                                     |
| 2                                                         | Grants or contracts from any entity (if not indicated in item #1 above).                                                                                                       | None                                                                                         |                                                                                     |
|                                                           |                                                                                                                                                                                |                                                                                              |                                                                                     |
| 3                                                         | Royalties or licenses                                                                                                                                                          | None                                                                                         |                                                                                     |
|                                                           |                                                                                                                                                                                |                                                                                              |                                                                                     |
| 4                                                         | Consulting fees                                                                                                                                                                | None                                                                                         |                                                                                     |
|                                                           |                                                                                                                                                                                |                                                                                              |                                                                                     |
|                                                           |                                                                                                                                                                                |                                                                                              |                                                                                     |

|    |                                                                                                              |                         |                                           |
|----|--------------------------------------------------------------------------------------------------------------|-------------------------|-------------------------------------------|
| 5  | Payment or honoraria for lectures, presentations, speakers bureaus, manuscript writing or educational events | <u>    </u> None        |                                           |
| 6  | Payment for expert testimony                                                                                 | <u>    </u> None        |                                           |
| 7  | Support for attending meetings and/or travel                                                                 | <u>    </u> None        |                                           |
| 8  | Patents planned, issued or pending                                                                           | <u>    </u> None        |                                           |
| 9  | Participation on a Data Safety Monitoring Board or Advisory Board                                            | <u>    </u> None        |                                           |
| 10 | Leadership or fiduciary role in other board, society, committee or advocacy group, paid or unpaid            | <u>    </u> None        |                                           |
| 11 | Stock or stock options                                                                                       | <u>    </u> None        |                                           |
| 12 | Receipt of equipment, materials, drugs, medical writing, gifts or other services                             | <u>    </u> None        |                                           |
|    |                                                                                                              | AstraZeneca             | Medical writing support – this manuscript |
| 13 | Other financial or non-financial interests                                                                   | <u>    </u> AstraZeneca | Employee                                  |

Please place an “X” next to the following statement to indicate your agreement:

  X   I certify that I have answered every question and have not altered the wording of any of the questions on this form.
